# Supplementary material for: Metabolites of the anaerobic degradation of diethyl ether by denitrifying betaproteobacterium strain HxN1
Source: Royal Society of Chemistry journal article supplement (doi:10.1039/d0ob01419b), 2020-01-01
Supplement: d0ob01419b1.pdf [file d0ob01419b1.pdf]

## Supporting Information

- (1a) Comparison of gas chromatograms (GC-MS) of the methylated culture extract of strain HxN1 with the synthetic standards (S)-**13e**, (S)-**9b**, **7e** and (3*R*\*,4*S*)-**11b** including co-injection experiments.  
Pages S2 – S11
- (1b) Comparison of mass spectra (extracted from the GC-MS data) of the metabolites with the synthetic standards (S)-**13e**, (S)-**9b**, **7e** and (3*R*\*,4*S*)-**11b**.  
Page S12
- (2) Mass spectrum of synthetic standard (S)-**12b**.  
Page S12
- (3) <sup>1</sup>H and <sup>13</sup>C{<sup>1</sup>H} NMR spectra of all synthetic compounds reported in this manuscript.  
Pages S13 – S29
- (4) Detailed data for Mosher ester analysis of compound (3*R*,4*S*)-**11b**, including <sup>1</sup>H and HSQC NMR data as well as the comparative analysis of the <sup>1</sup>H NMR data of both diastereomeric MTPA esters.  
Pages S30 – S32

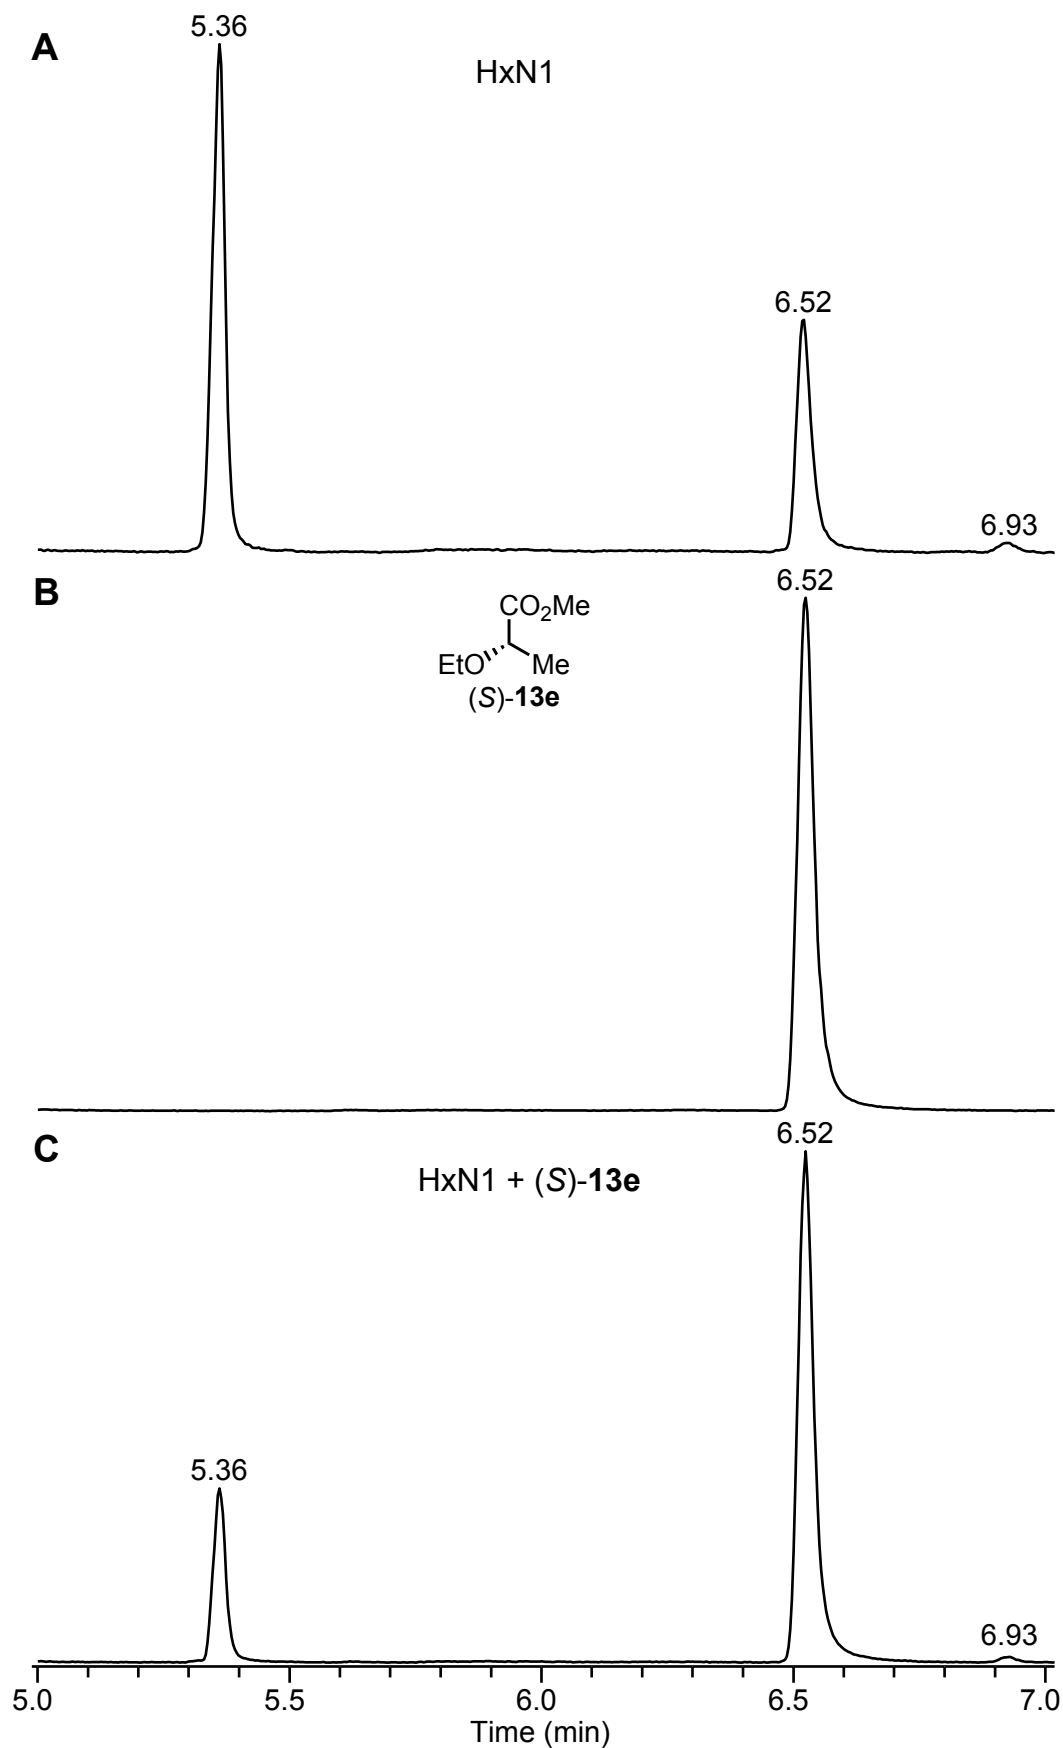

**Figure S1.** Gas chromatographic separation of (A) the methylated culture extract of strain HxN1, (B) the reference standard (S)-13e and (C) a co-injected mixture of the reference standard (S)-13e and the methylated culture extract of strain HxN1.

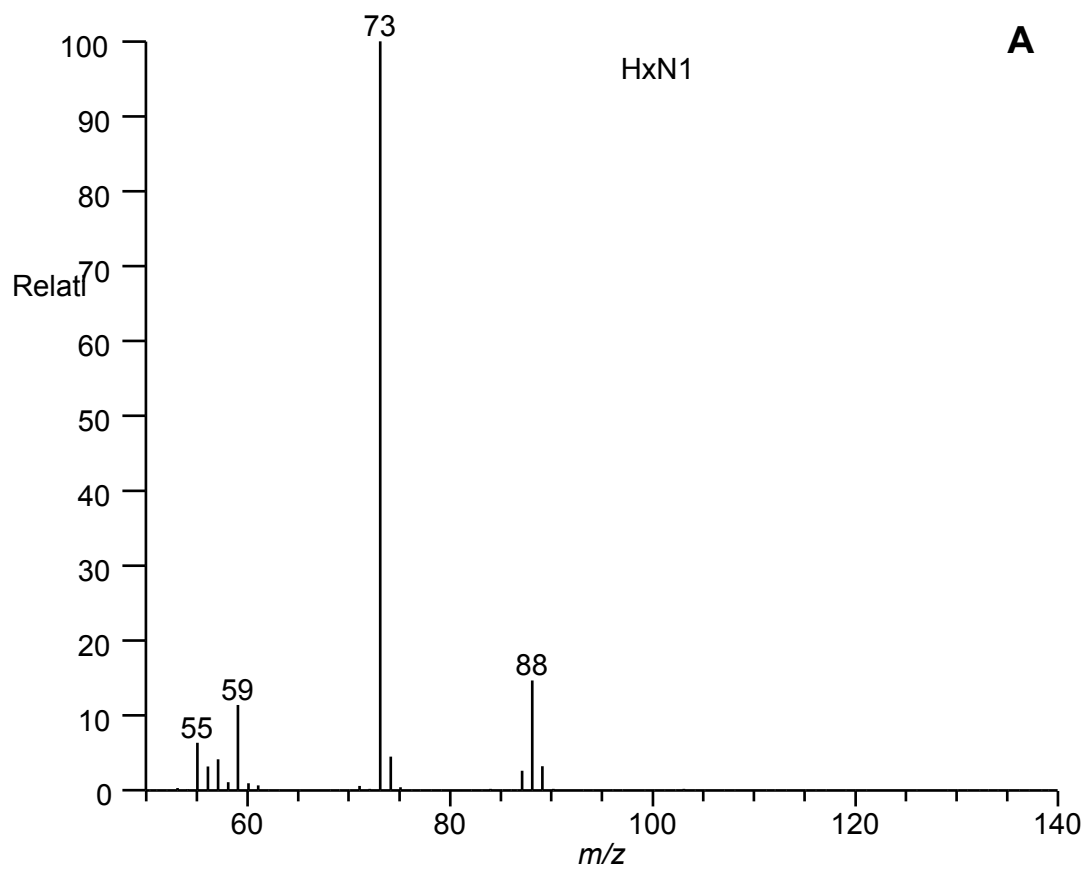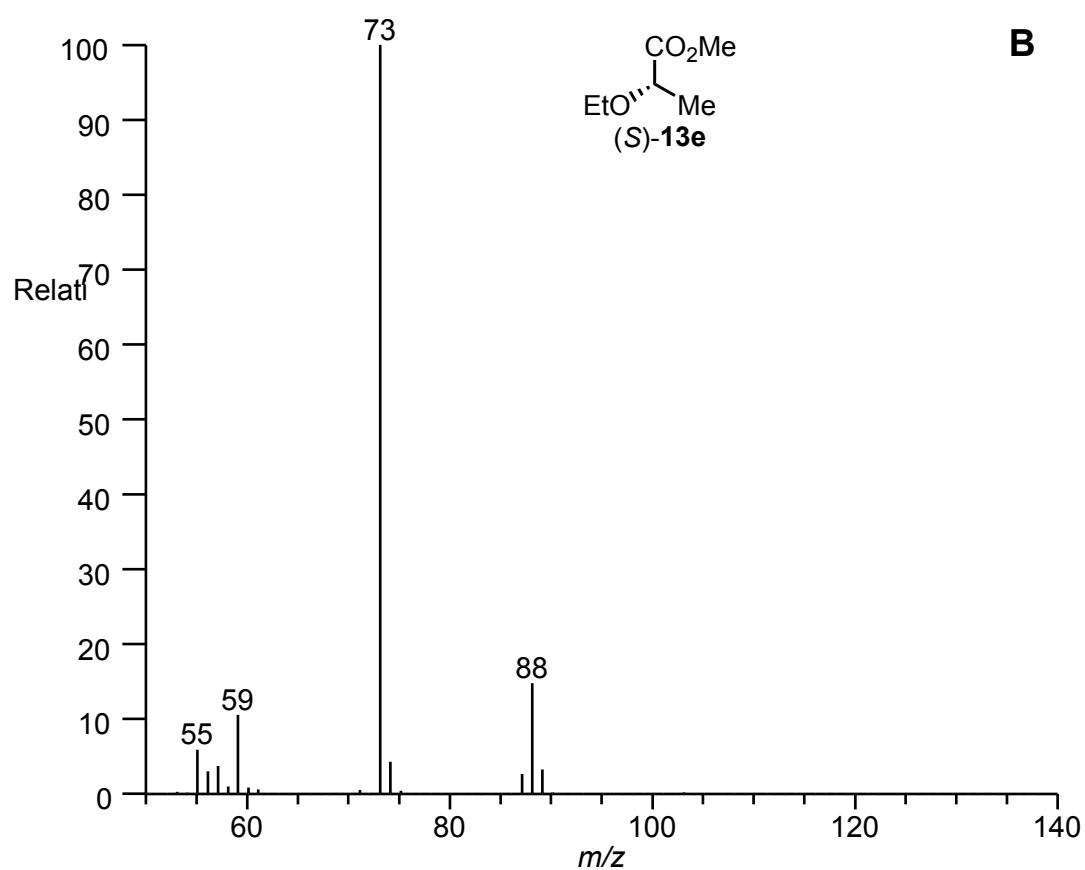

**Figure S2.** Mass spectra of (A) a metabolite specifically formed during anaerobic growth of strain HxN1 eluting at 6.52 min and (B) the reference standard (S)-13e eluting at 6.52 min.

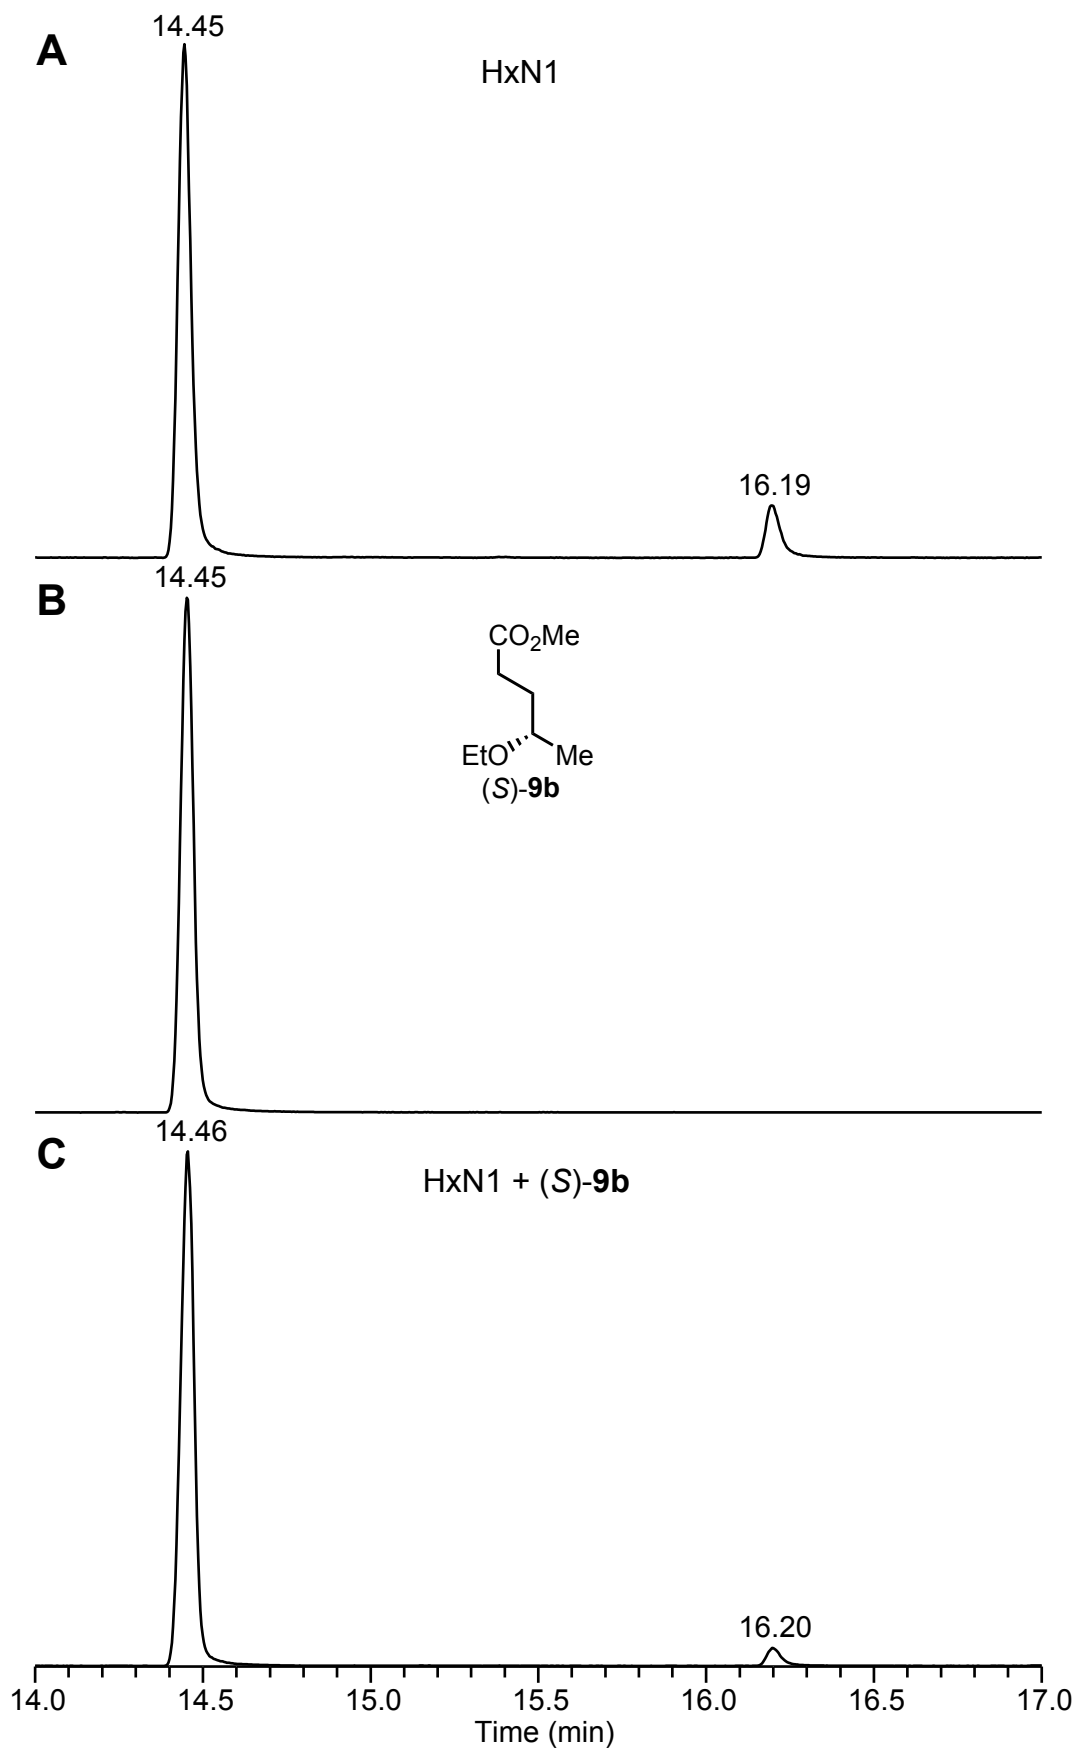

**Figure S3.** Gas chromatographic separation of (A) the methylated culture extract of strain HxN1, (B) the reference standard (S)-**9b** and (C) a co-injected mixture of the reference standard (S)-**9b** and the methylated culture extract of strain HxN1.

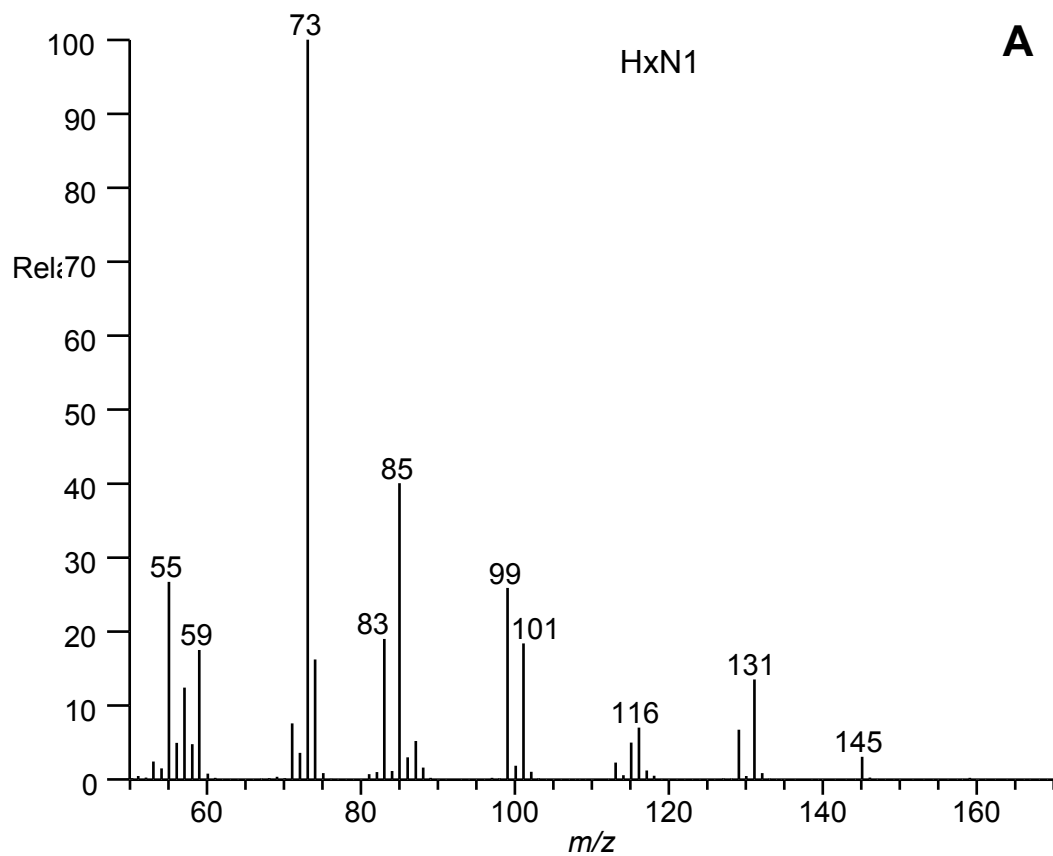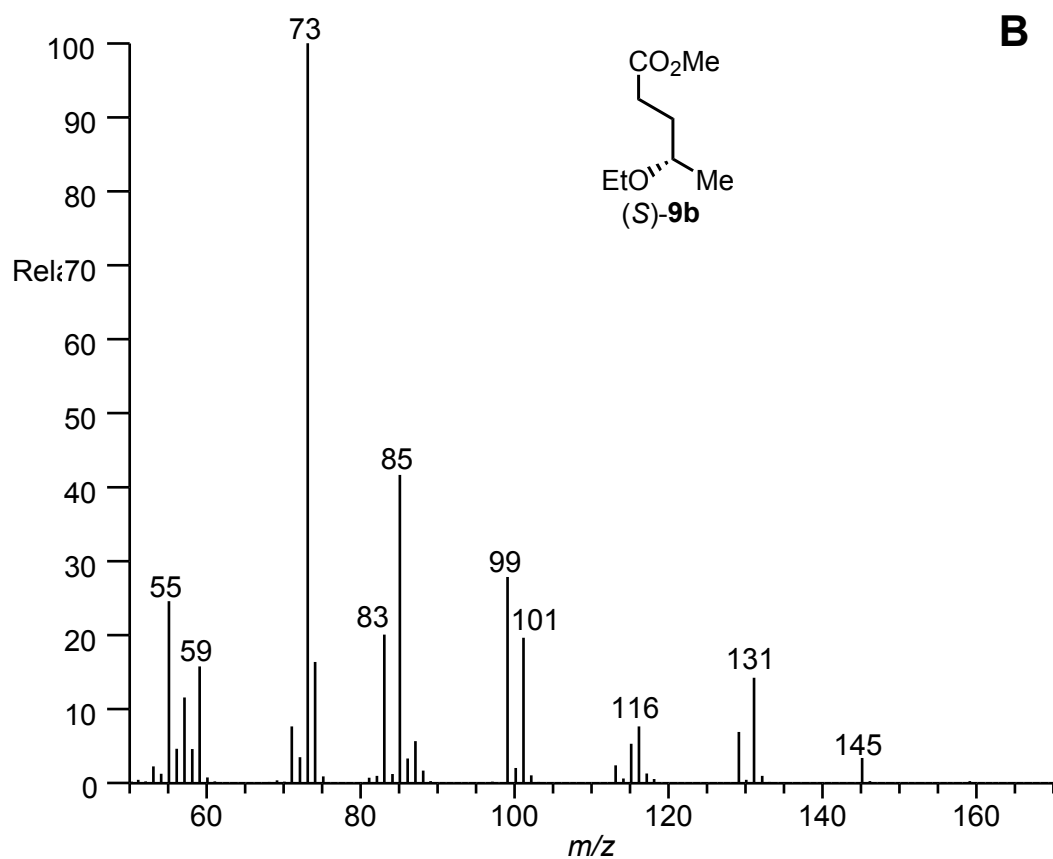

**Figure S4.** Mass spectra of (A) a metabolite specifically formed during anaerobic growth of strain HxN1 eluting at 14.45 min and (B) the reference standard (S)-**9b** eluting at 14.45 min.

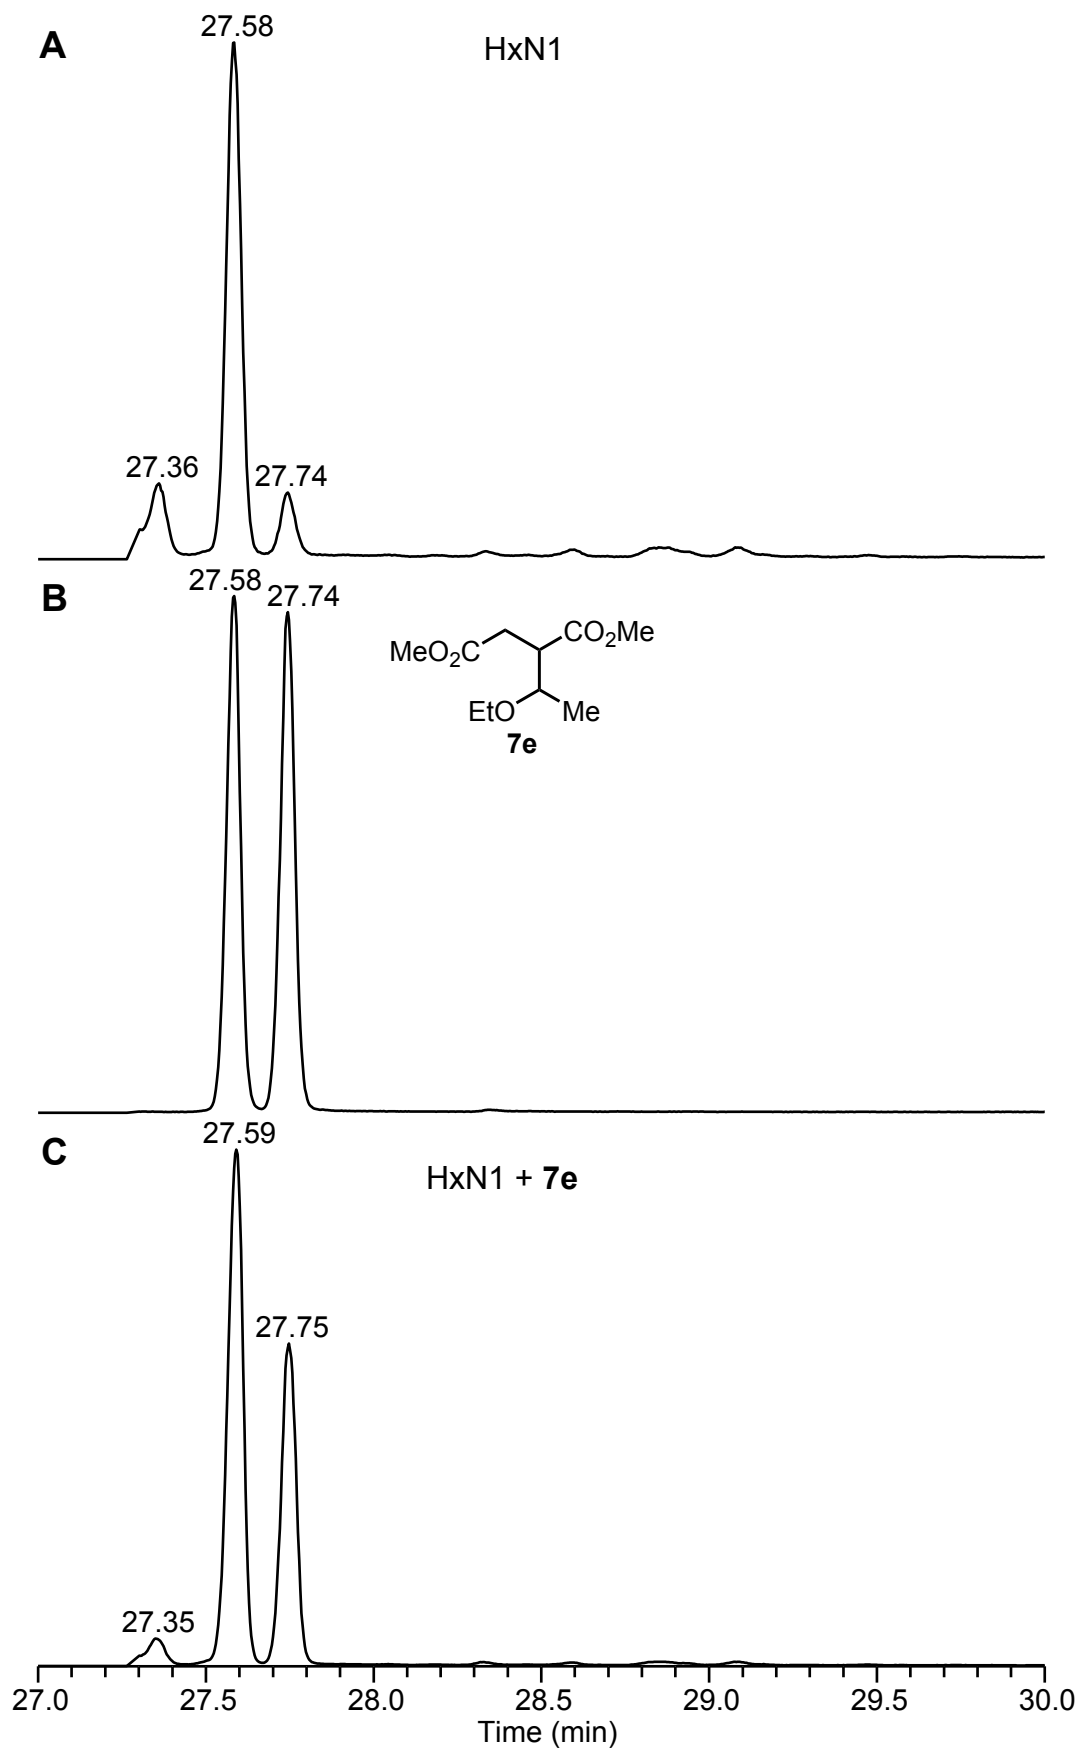

**Figure S5.** Gas chromatographic separation of (A) the methylated culture extract of strain HxN1, (B) the reference standard **7e** and (C) a co-injected mixture of the reference standard **7e** and the methylated culture extract of strain HxN1.

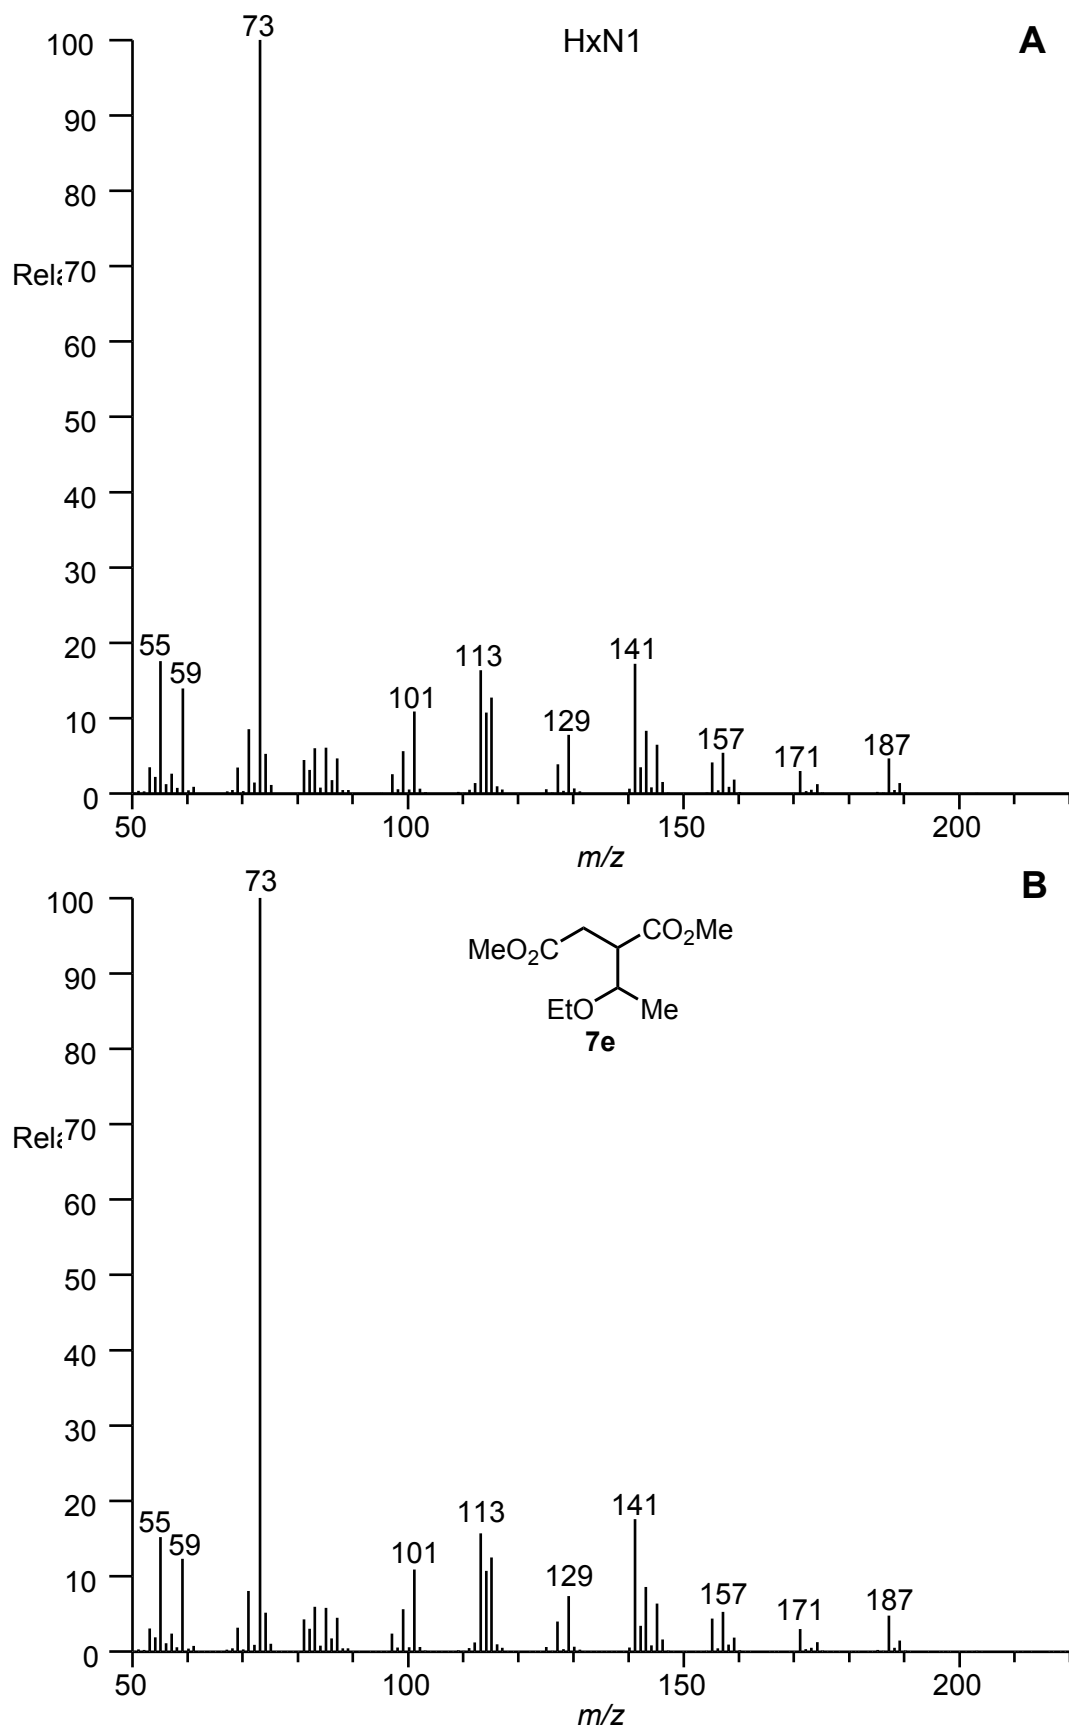

**Figure S6.** Mass spectra of (A) a metabolite specifically formed during anaerobic growth of strain eluting at 27.58 min and (B) the first diastereoisomer of the reference standard **7e** eluting at 27.58 min.

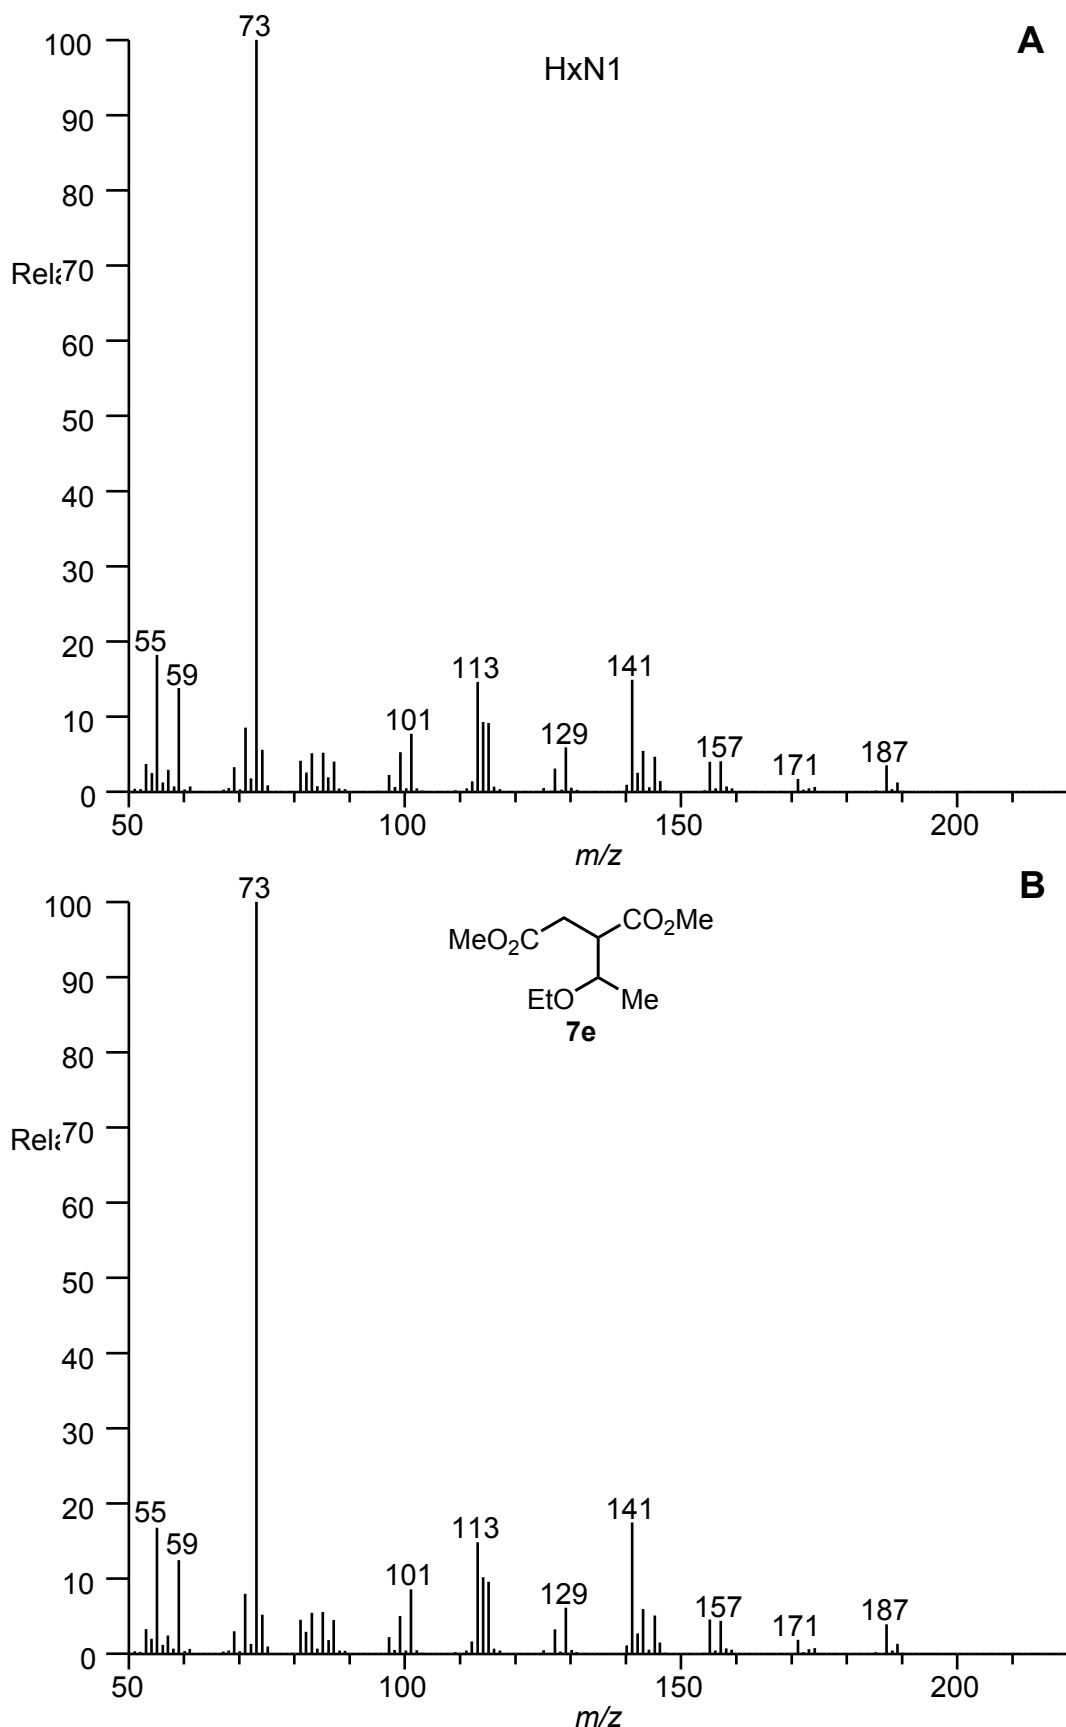

**Figure S7.** Mass spectra of (A) a metabolite specifically formed during anaerobic growth of strain HxN1 eluting at 27.74 min and (B) the second diastereoisomer of the reference standard **7e** eluting at 27.74 min.



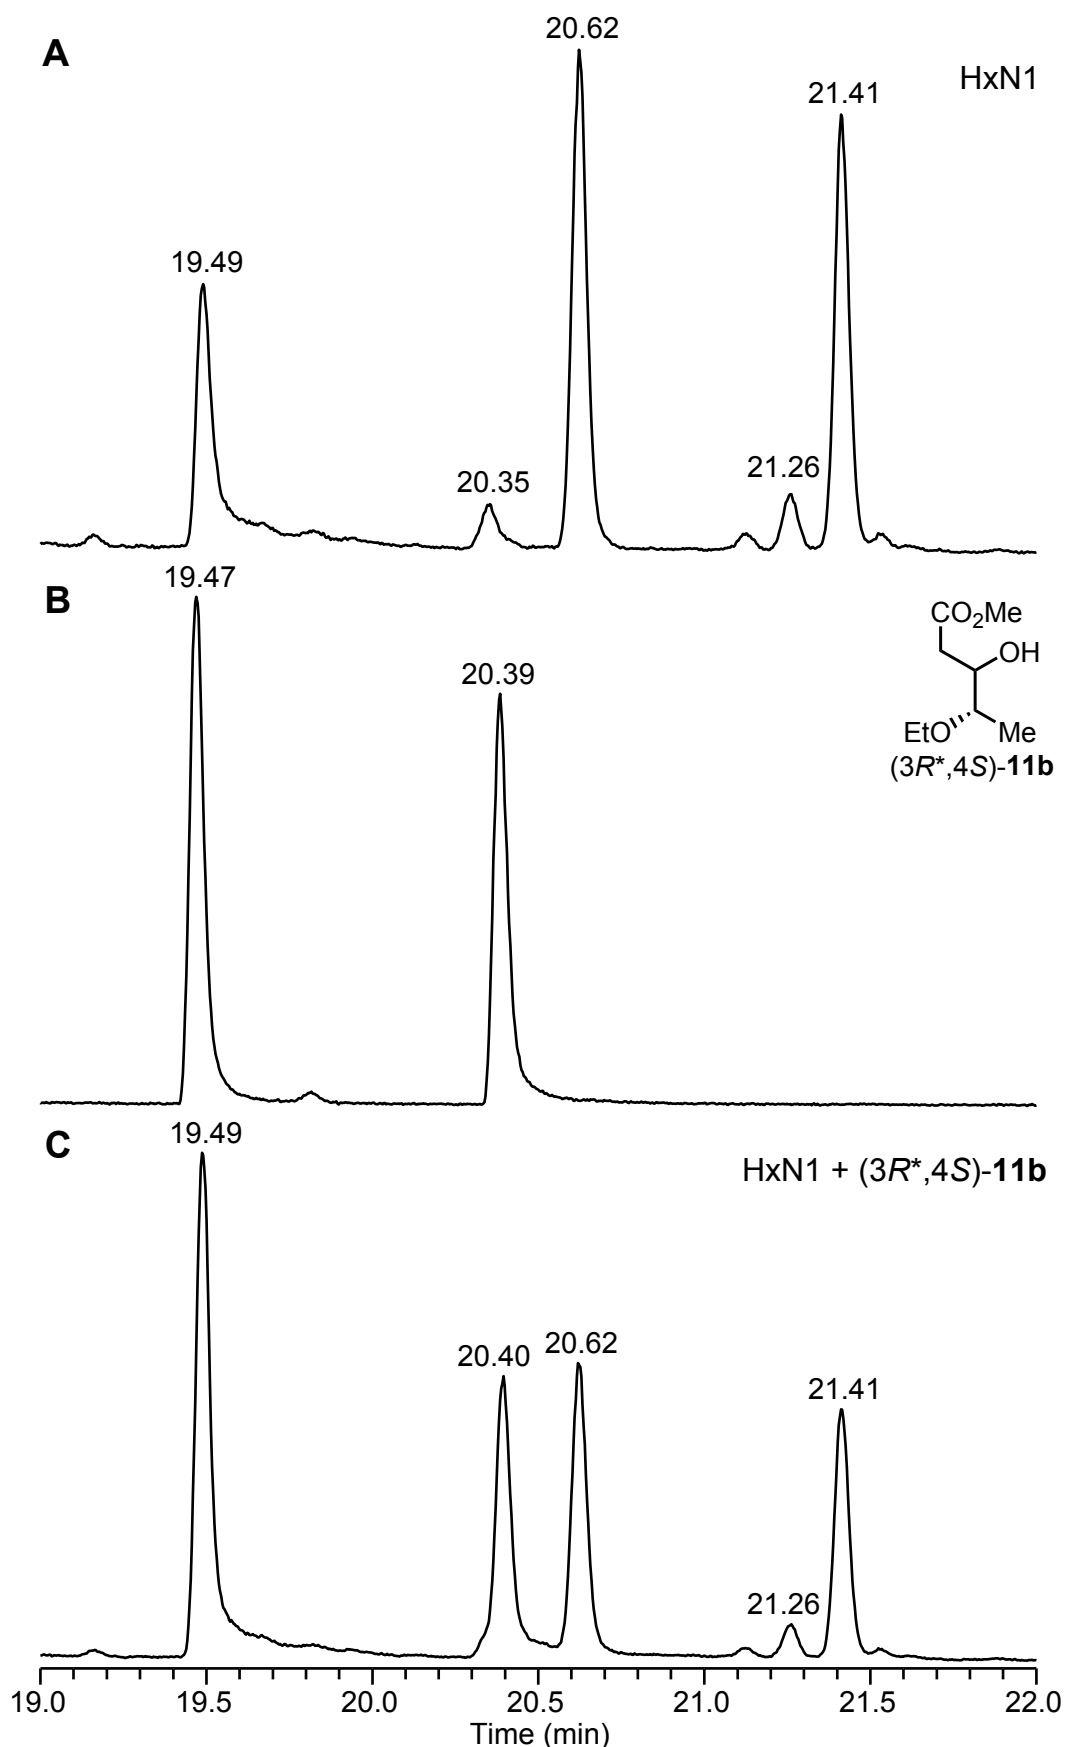

**Figure S8.** Gas chromatographic separation of (A) the methylated culture extract of strain HxN1, (B) both diastereoisomers of the reference standard (3*R*\*,4*S*)-**11b** and (C) a co-injected mixture of the reference standard (3*R*\*,4*S*)-**11b** and the methylated culture extract of strain HxN1. According to its mass spectral fragmentation pattern, the compound eluting at 20.35 min from the extract is not compound (3*R*\*,4*S*)-**11b**.

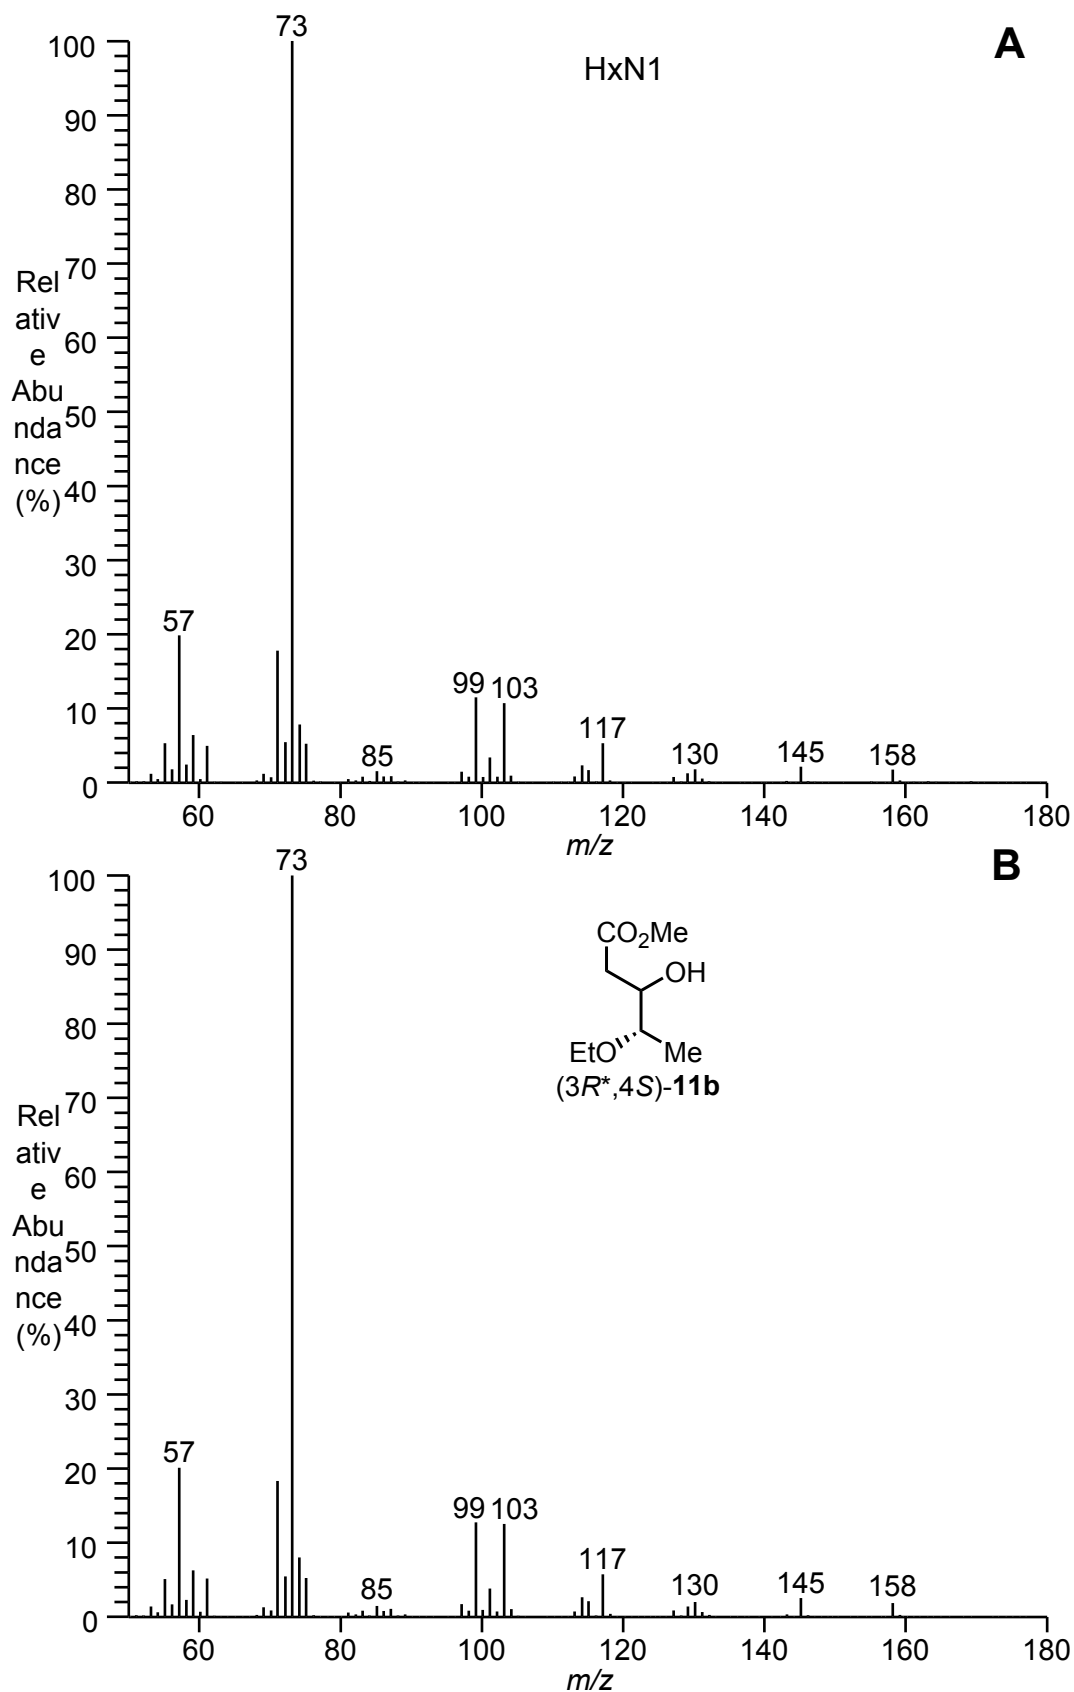

**Figure S9.** Mass spectra of (A) a metabolite specifically formed during anaerobic growth of strain HxN1 eluting at 19.49 min and (B) one diastereoisomer of the reference standard (3*R*\*,4*S*)-**11b** eluting at 19.47 min. The second diastereoisomers was not detected in the extracts

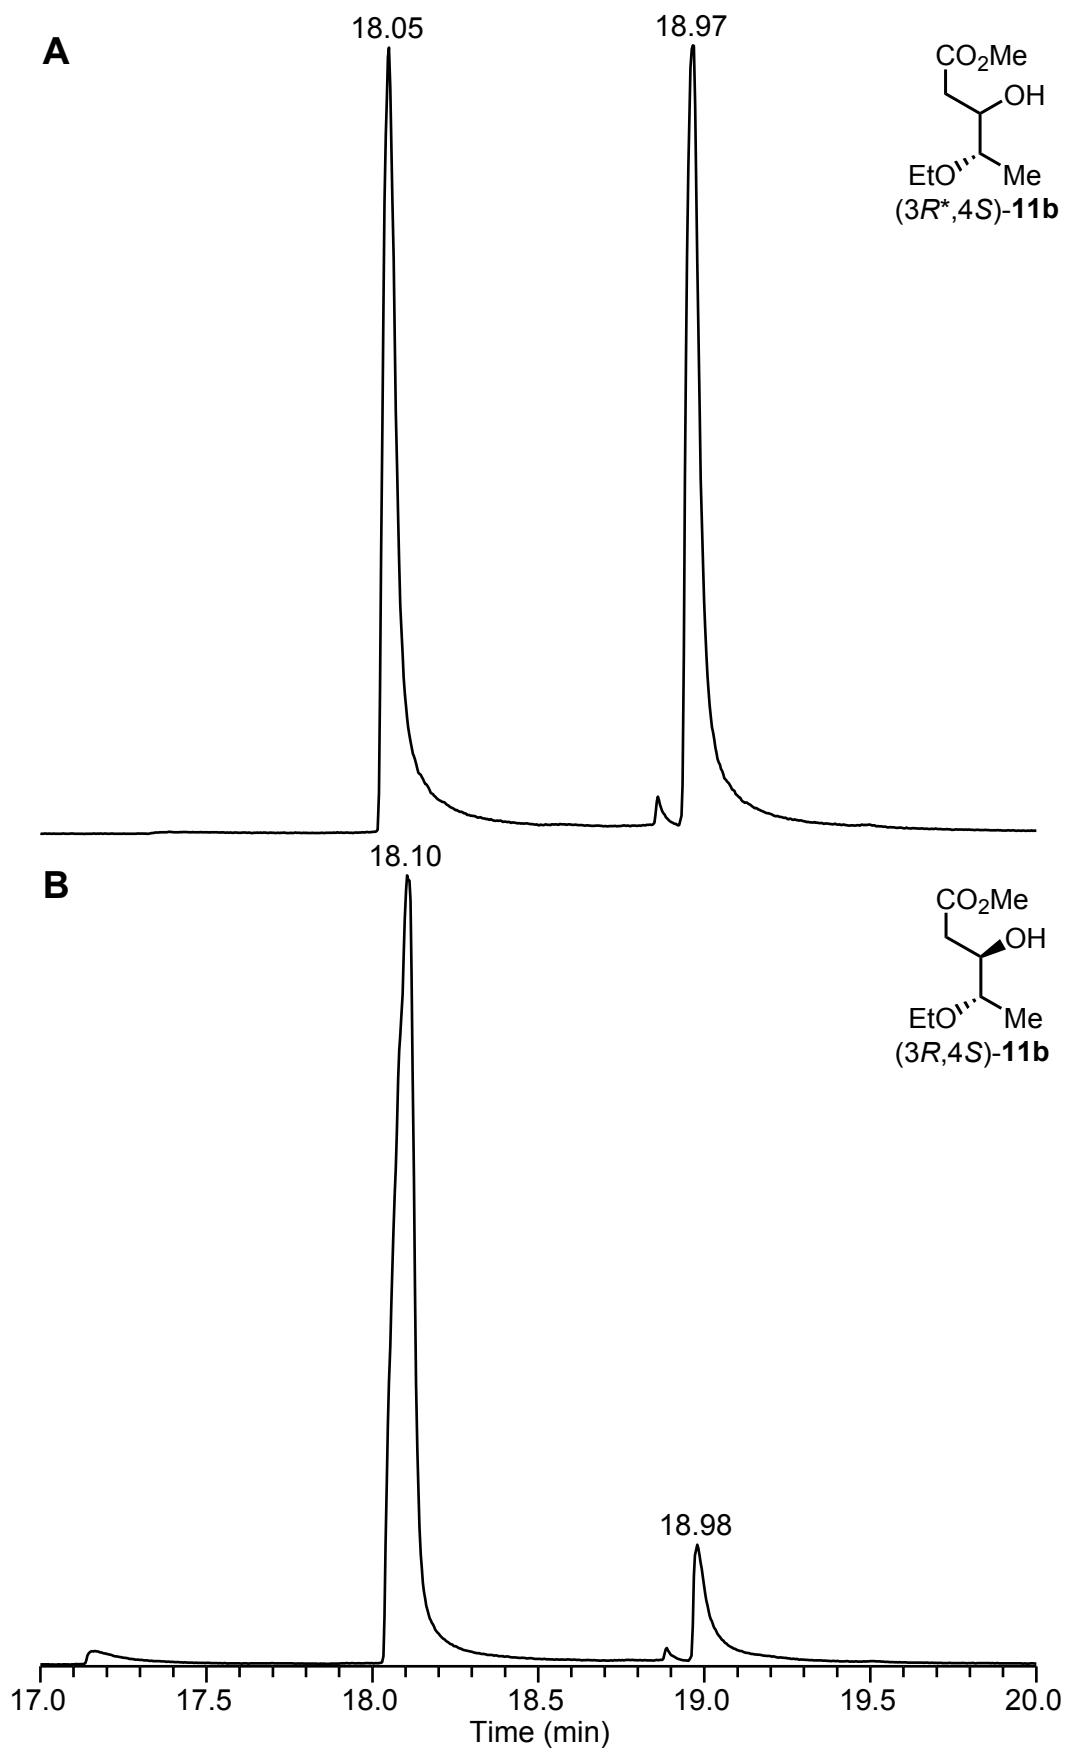

**Figure S10.** Gas chromatographic separation of (A) the reference standard (3*R*<sup>⋆</sup>,4*S*)-**11b** and (B) the reference standard (3*R*,4*S*)-**11b**. The retention times do not match with those of Figure S10 because the column was shortened.

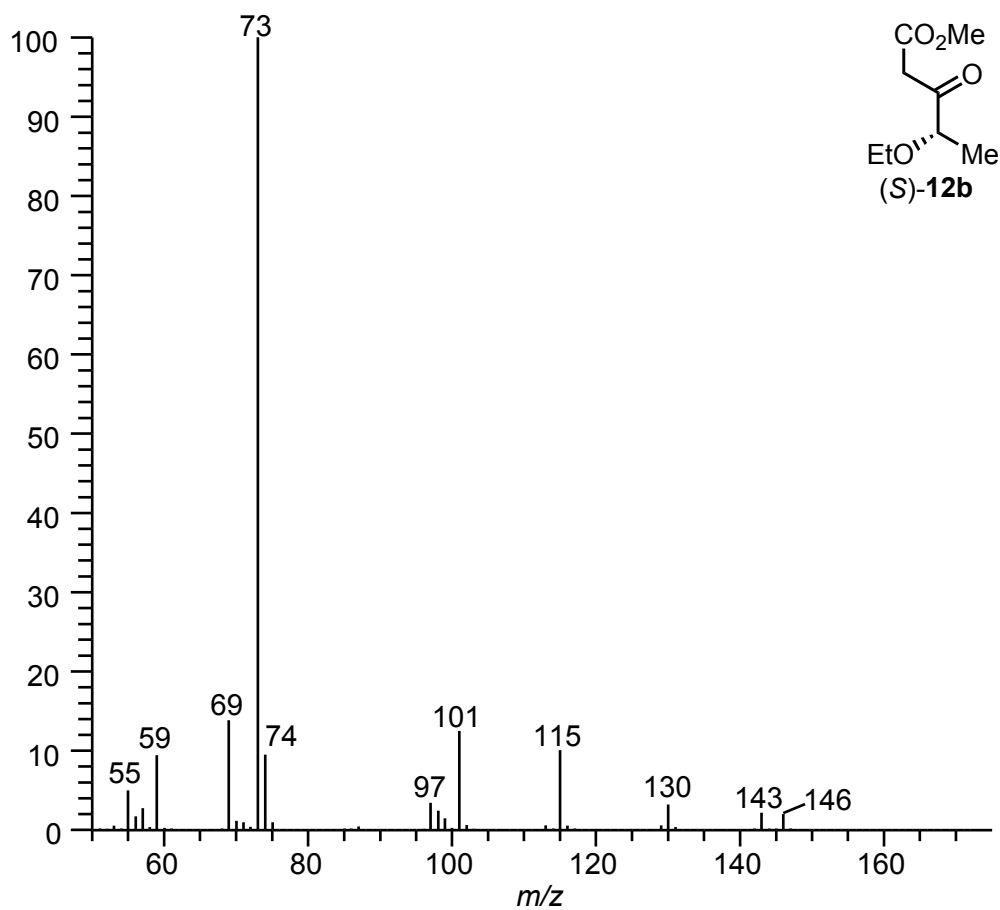

**Figure S11.** Mass spectrum of the reference standard (S)-12b eluting at 18.65 min.

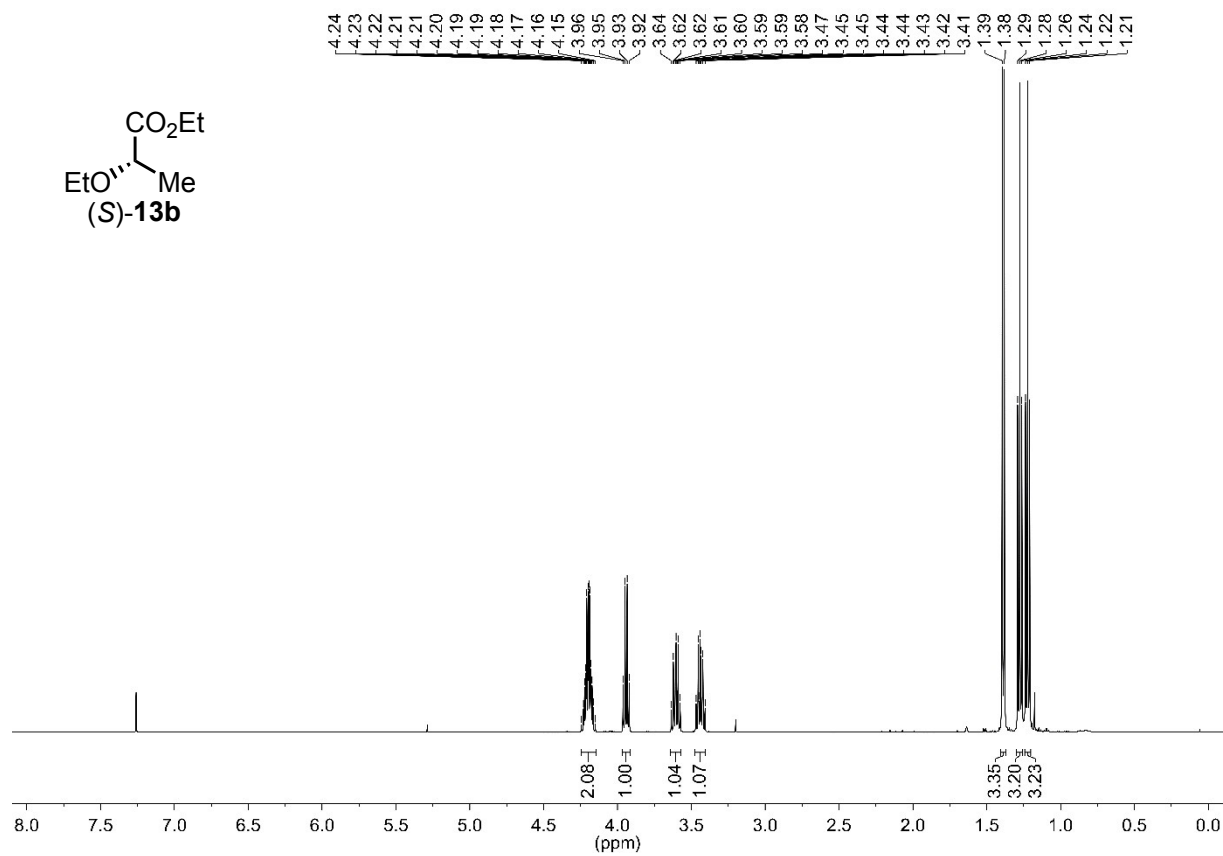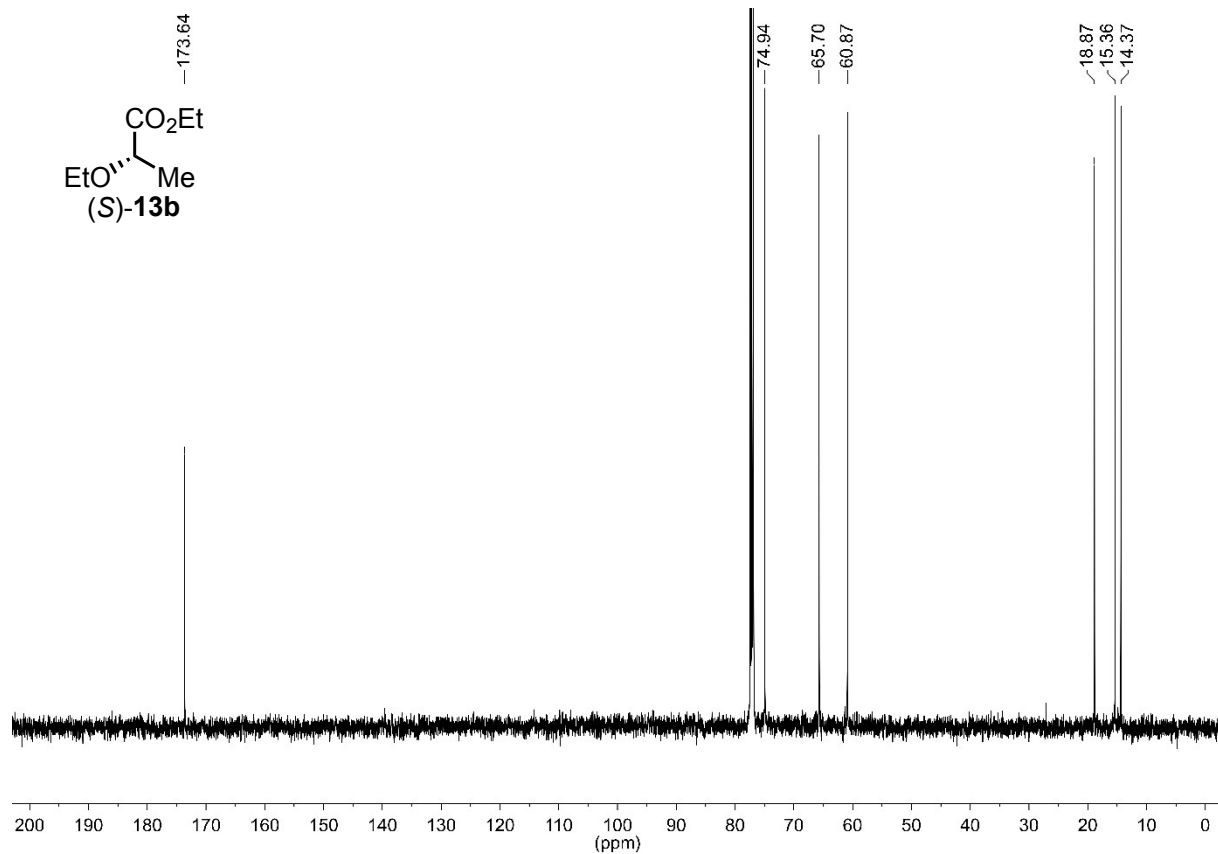

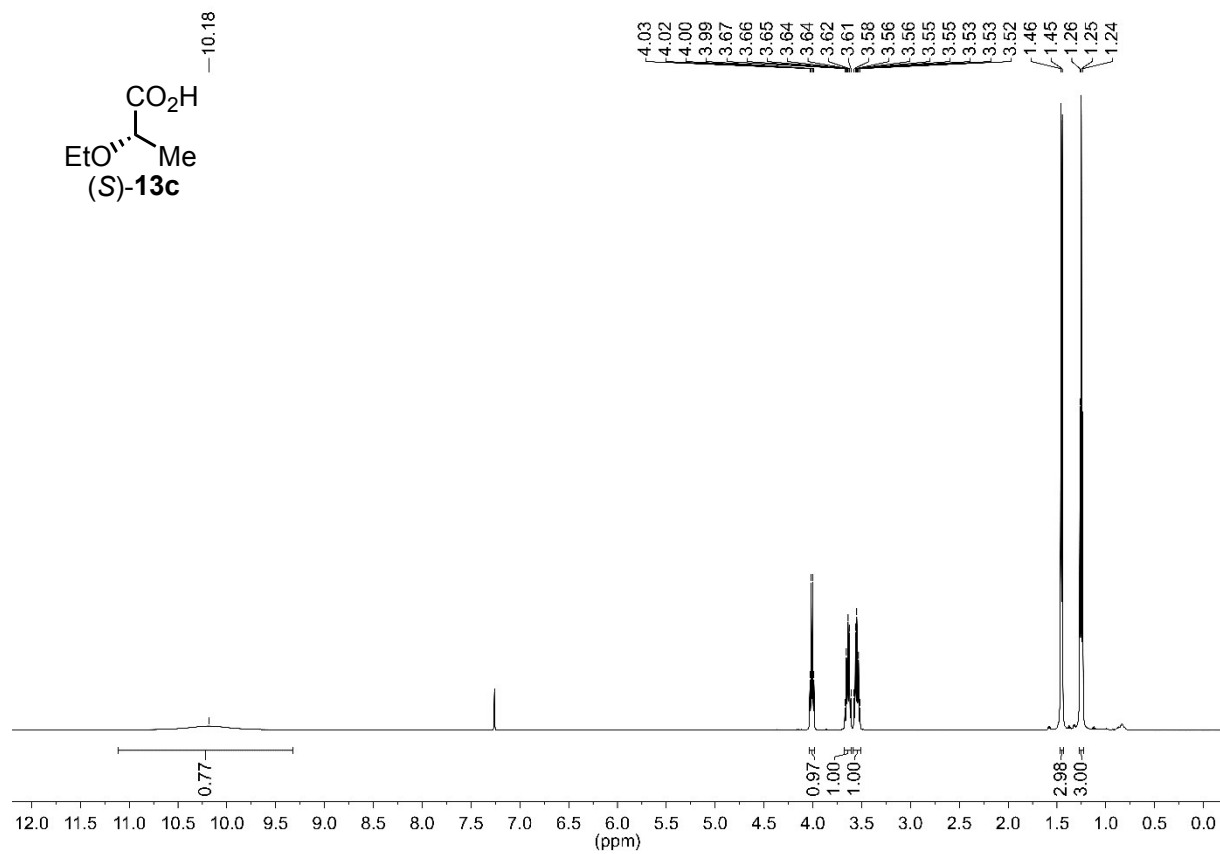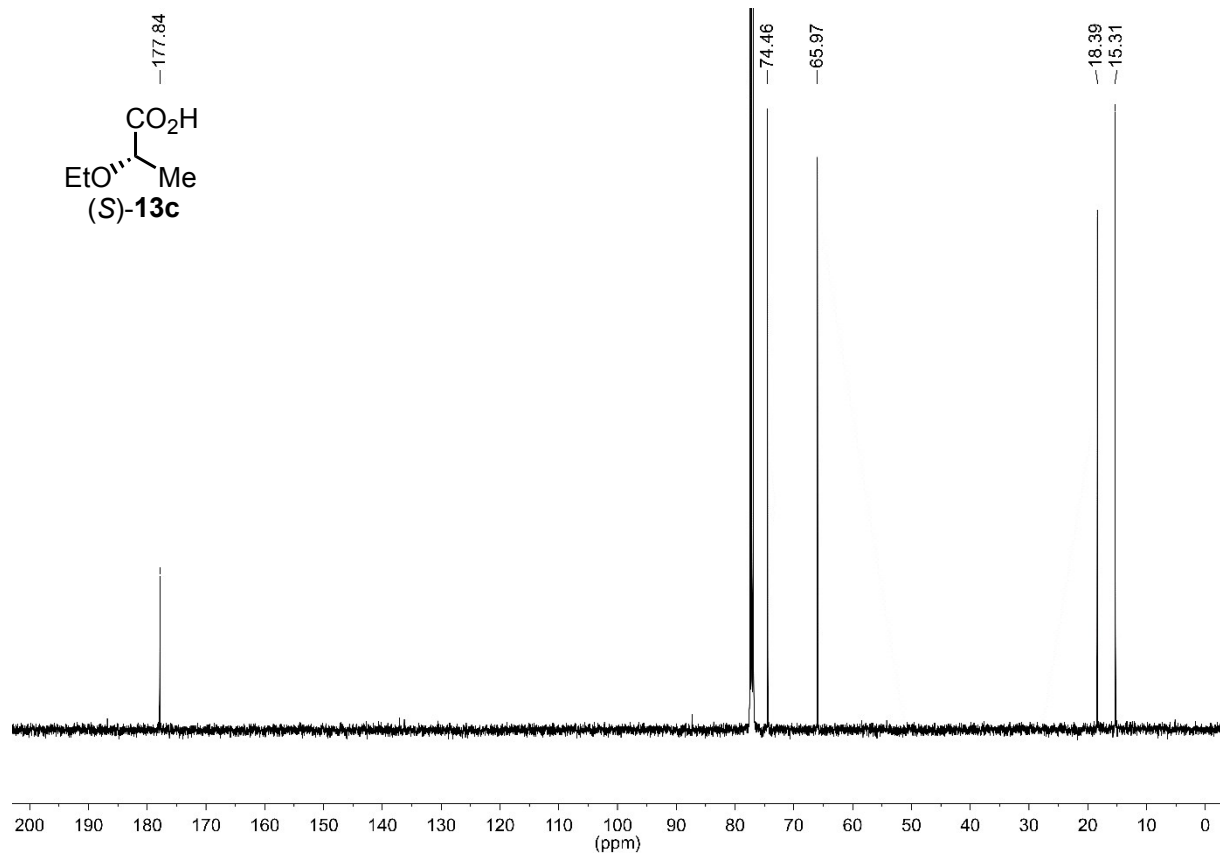

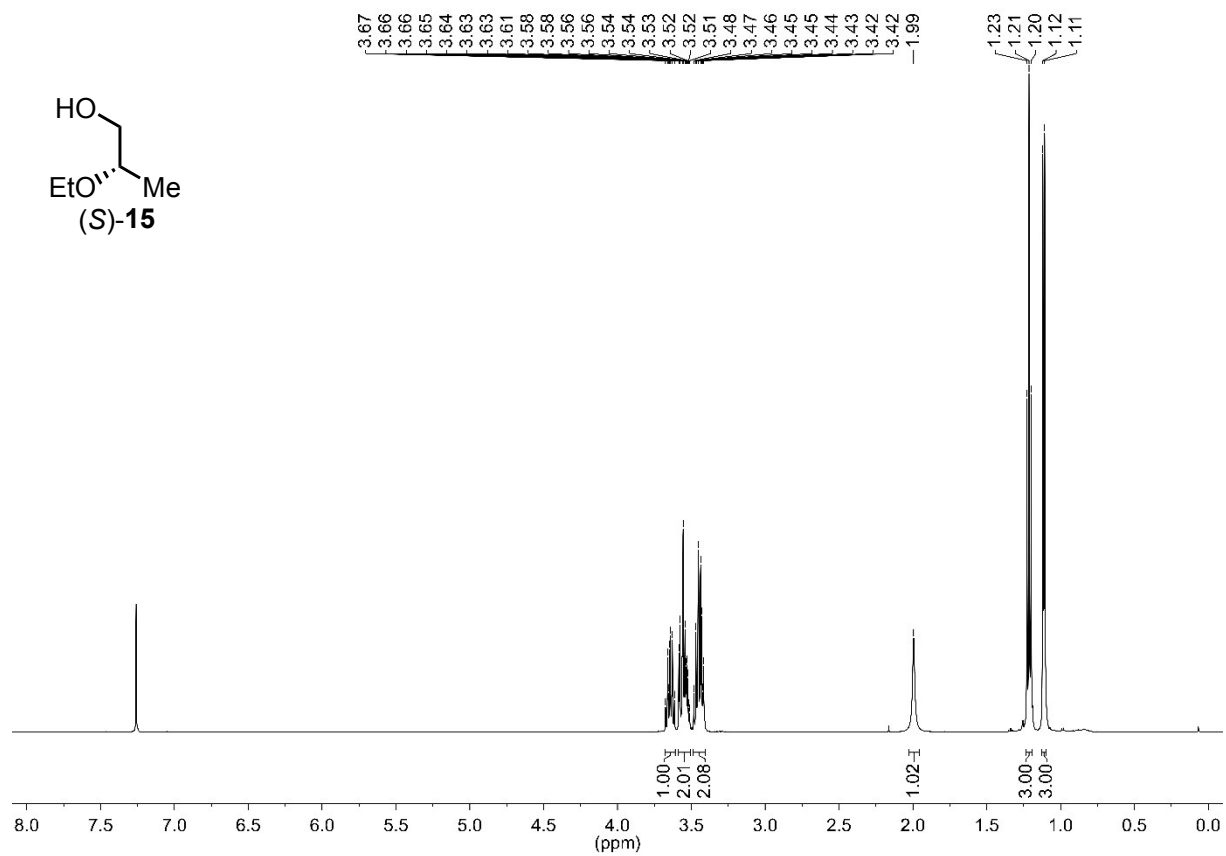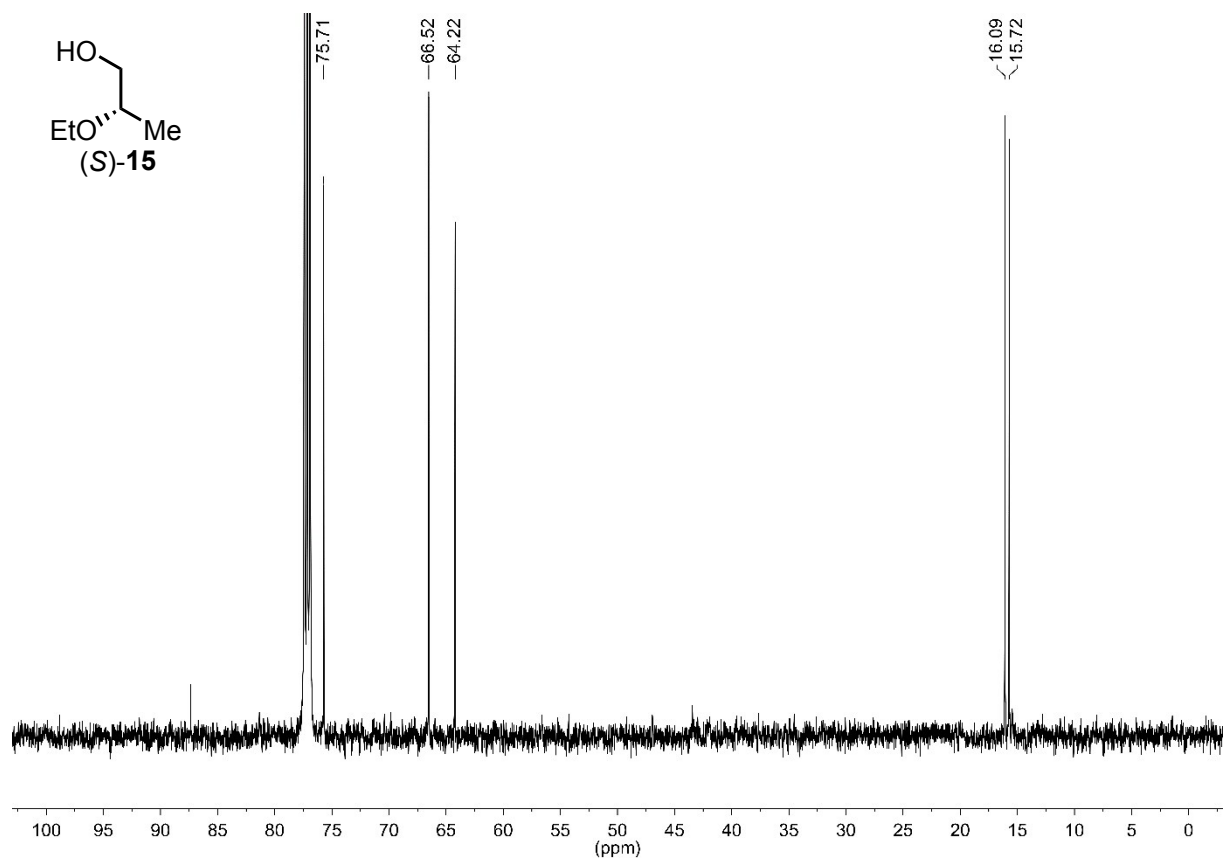

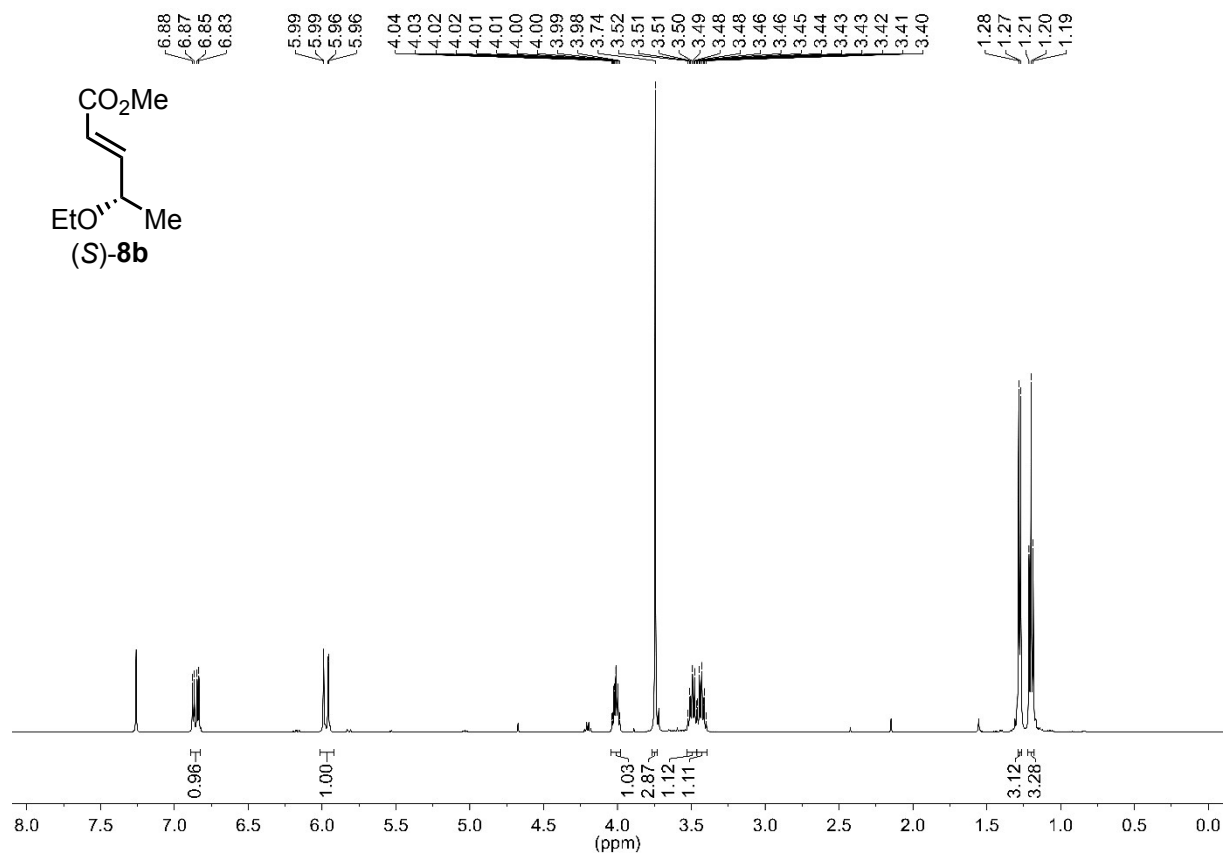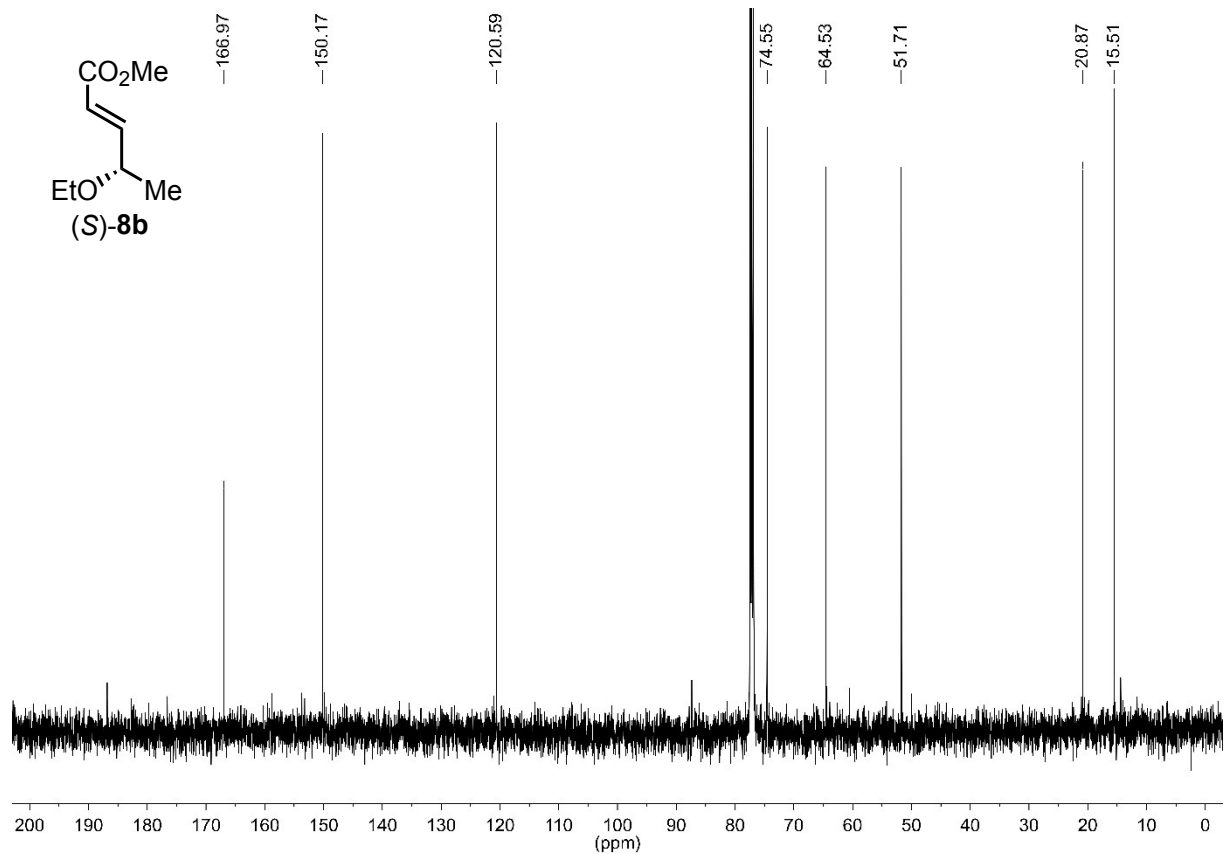



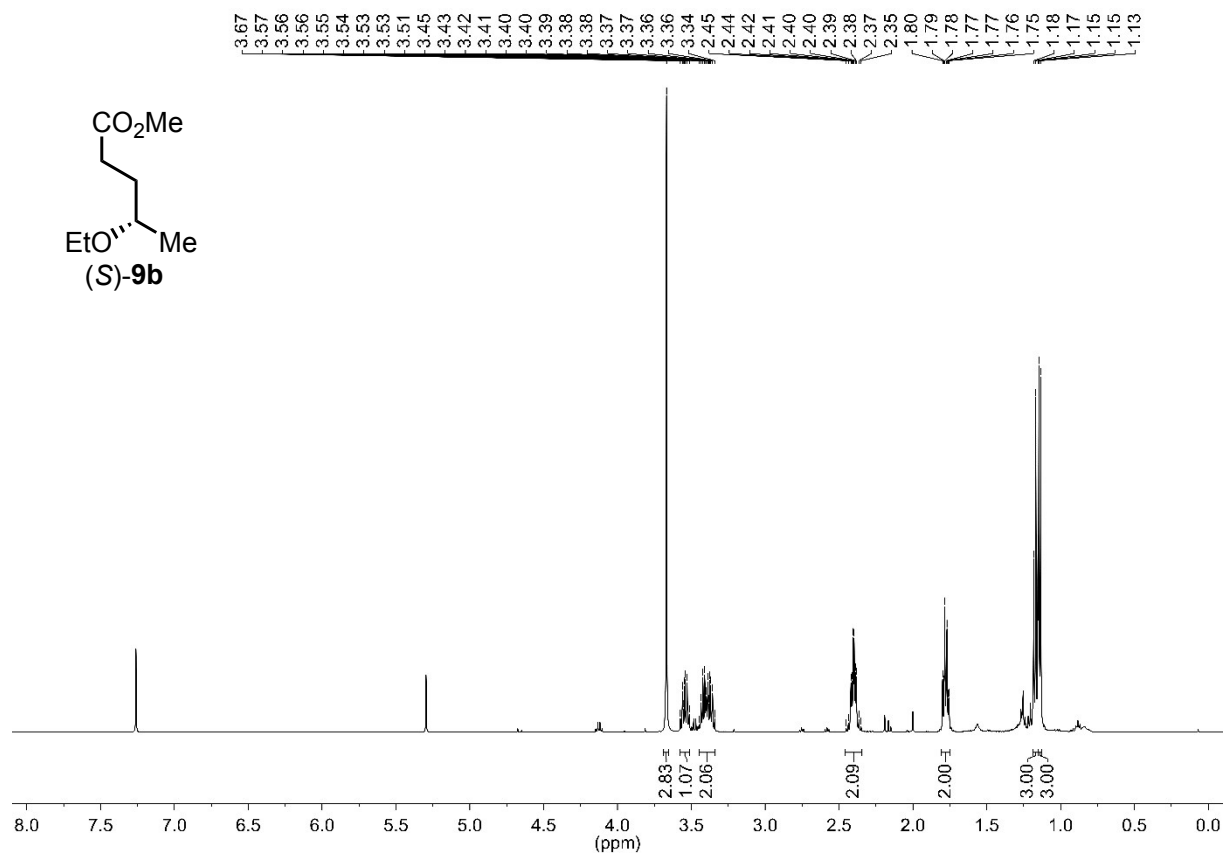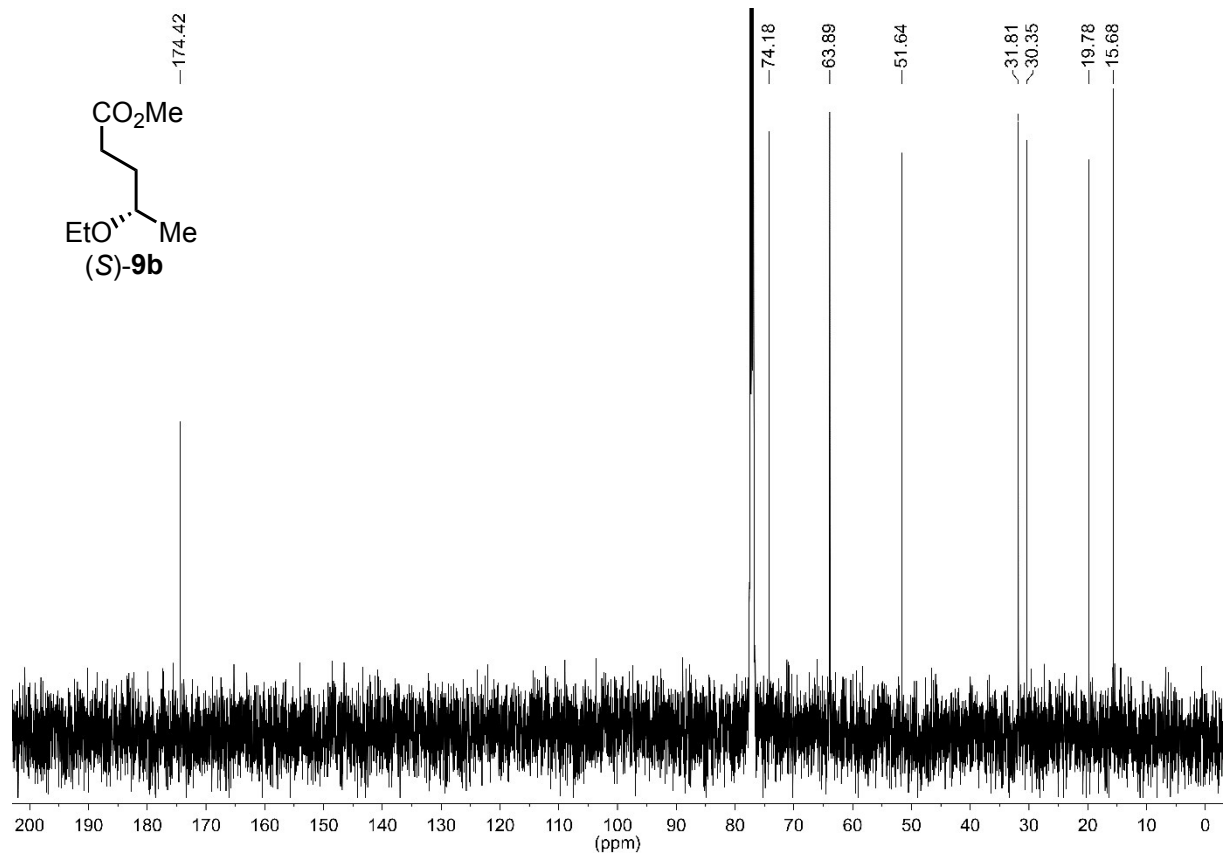

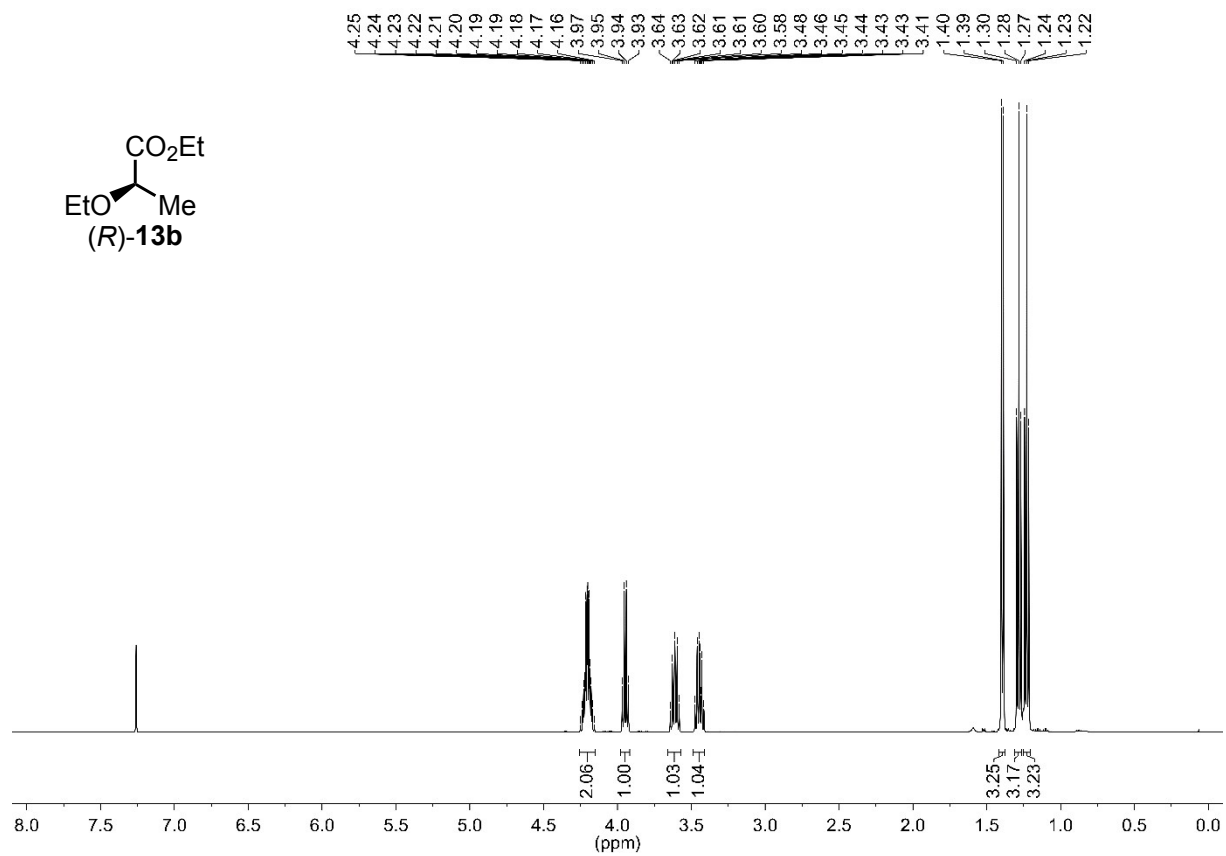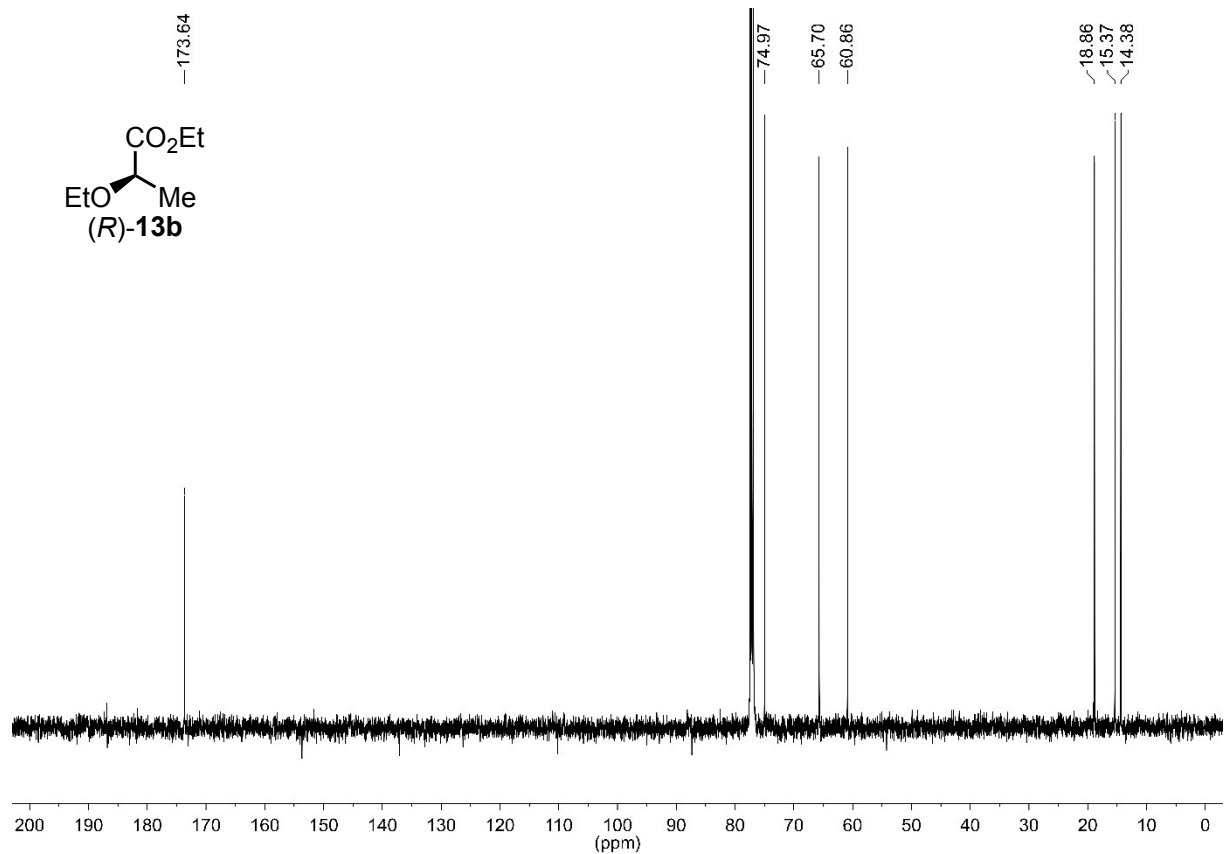

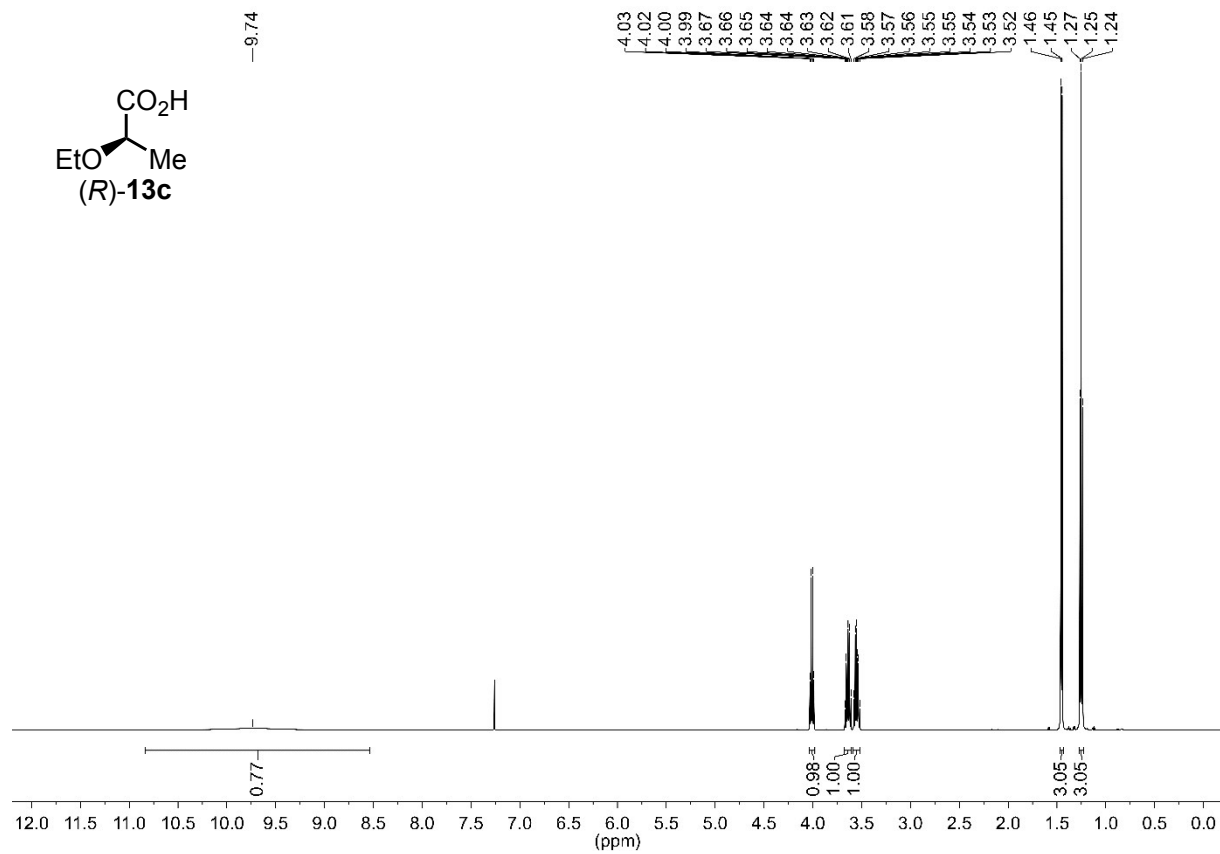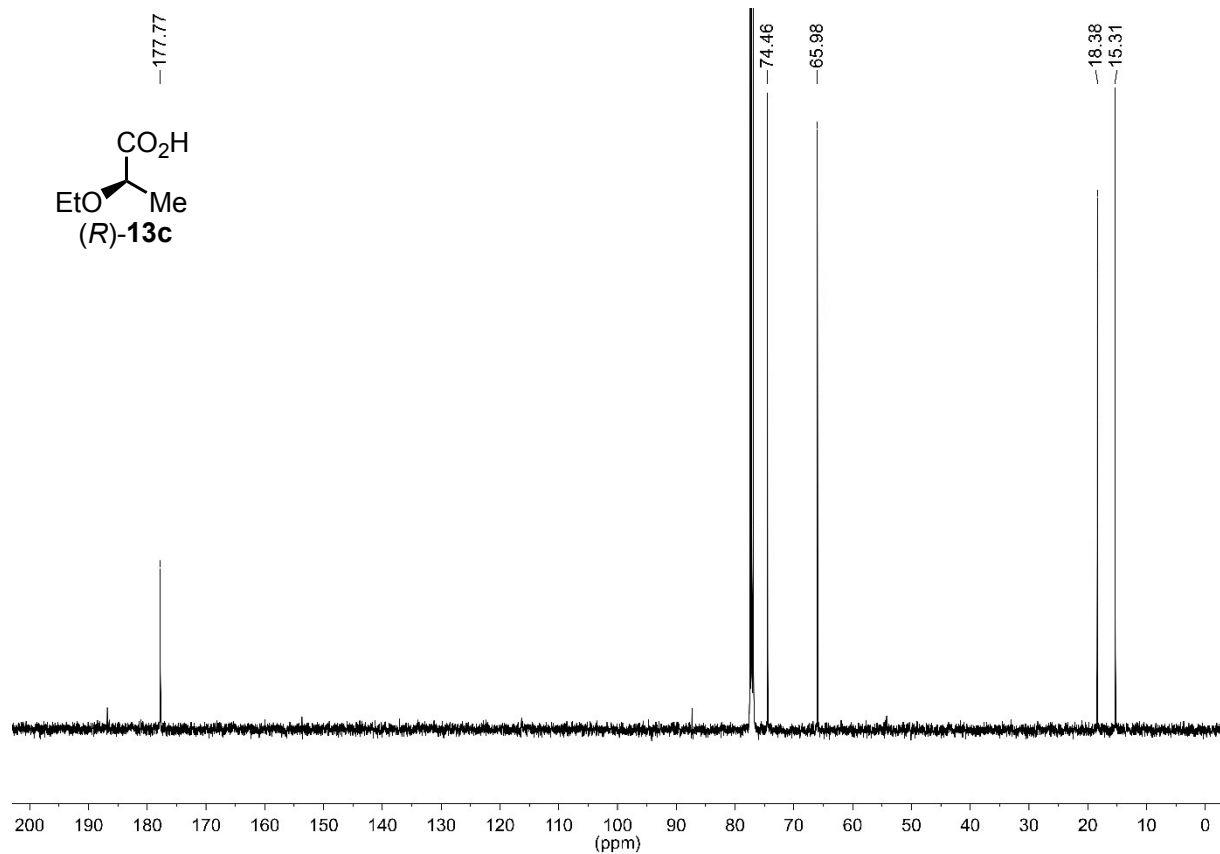

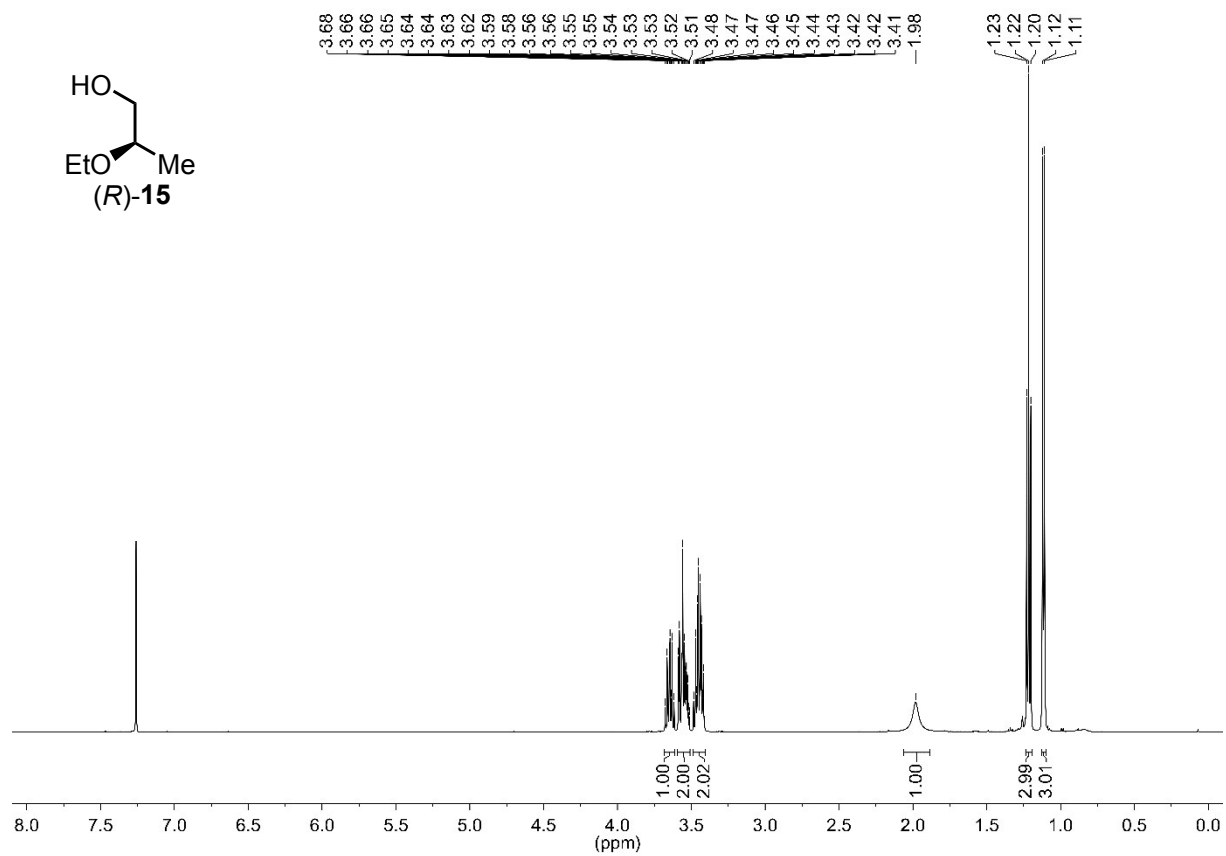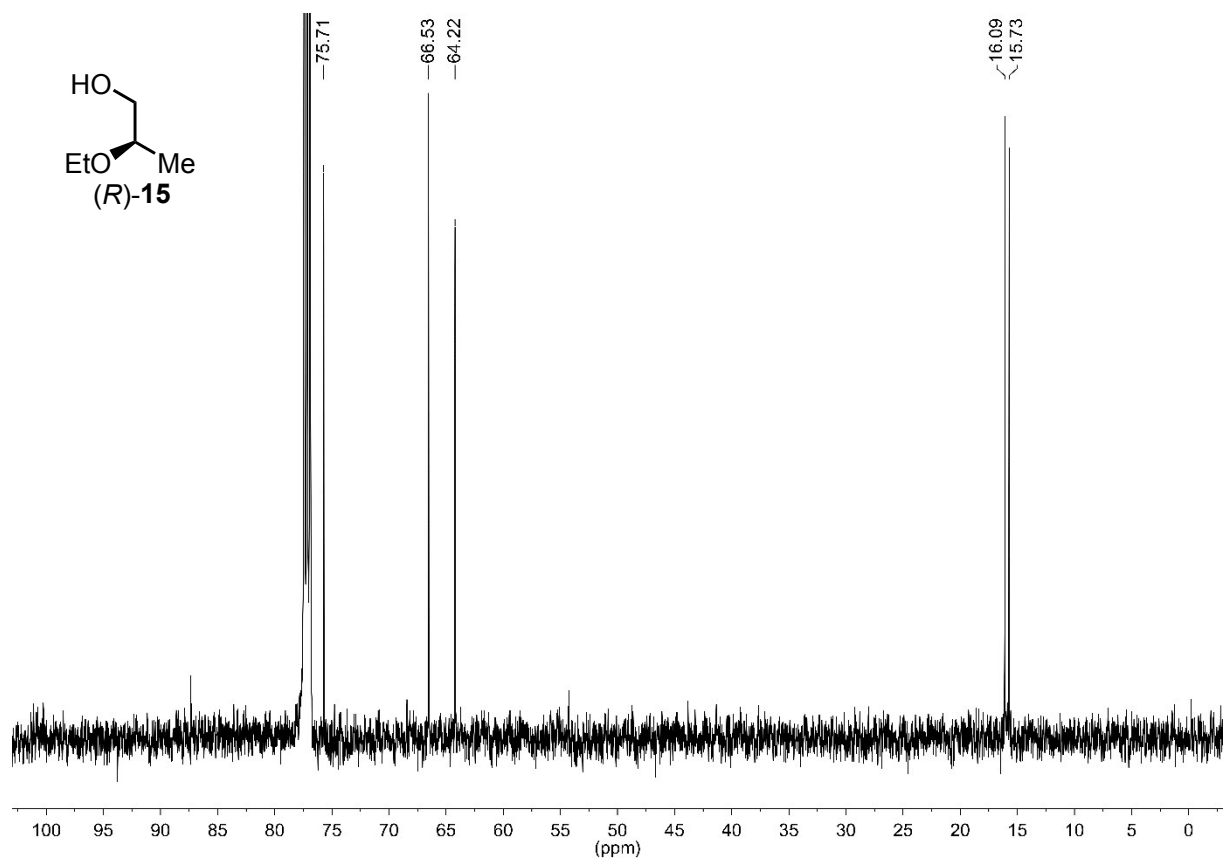

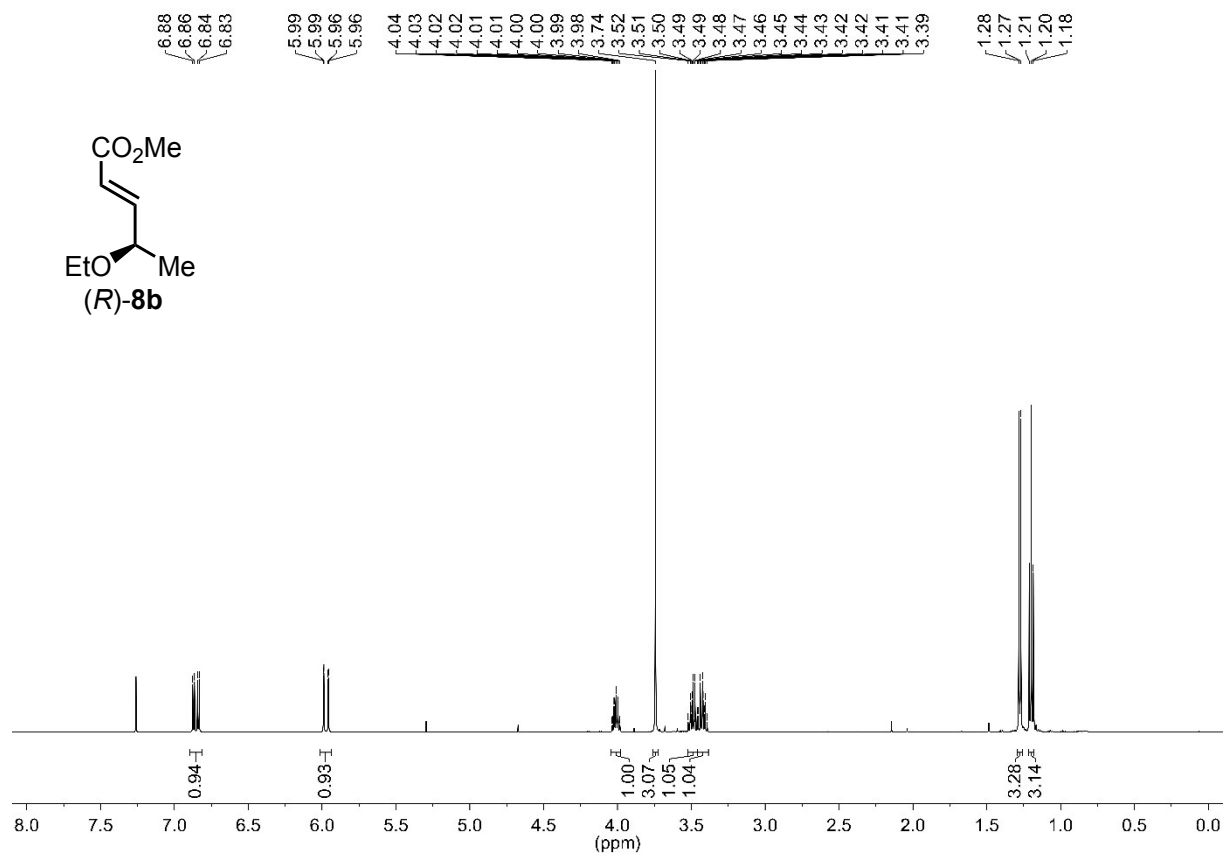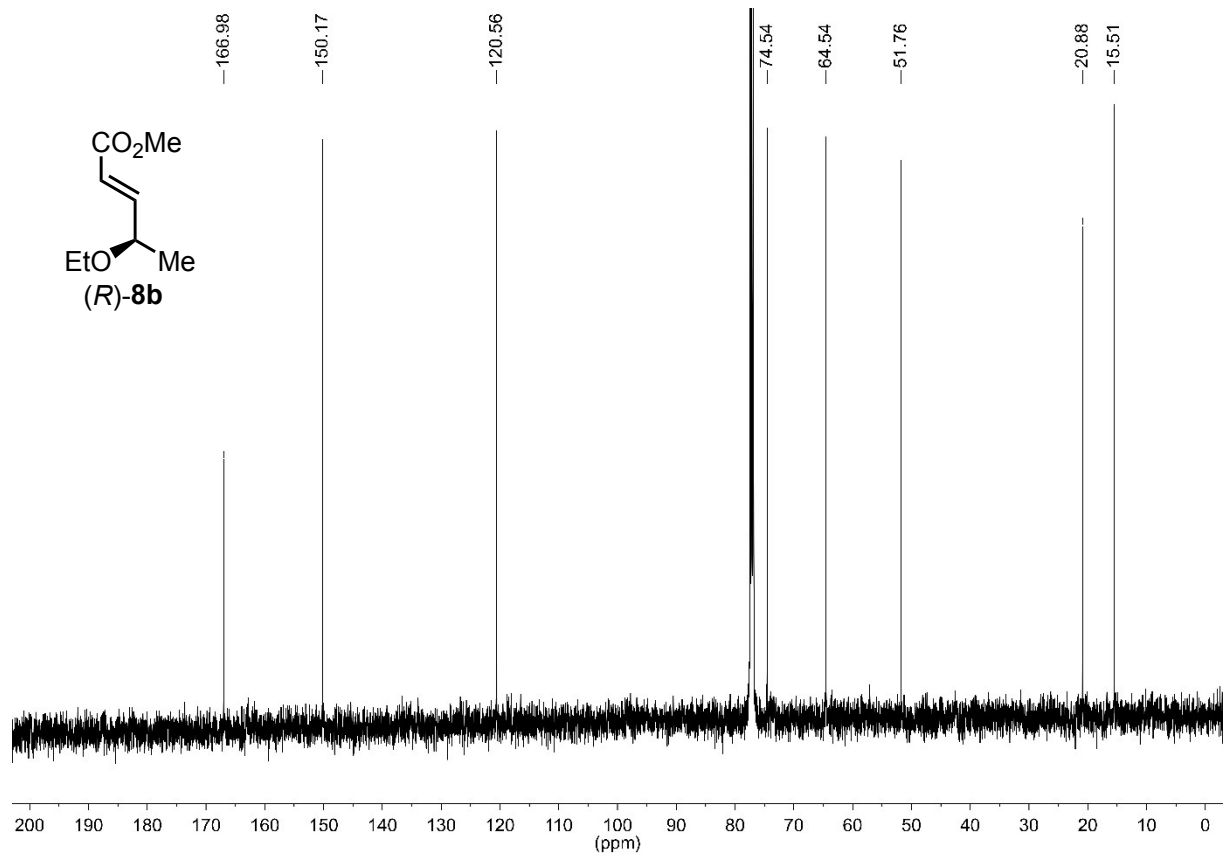

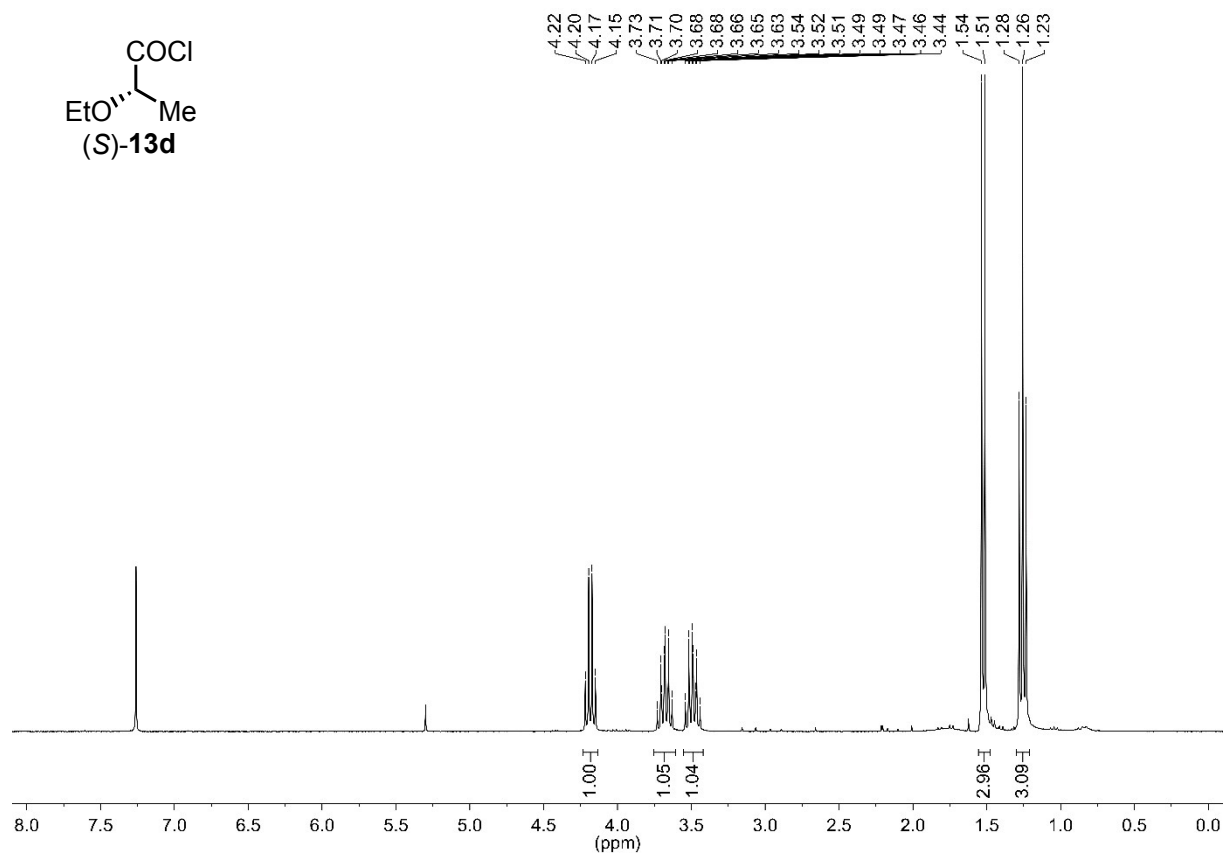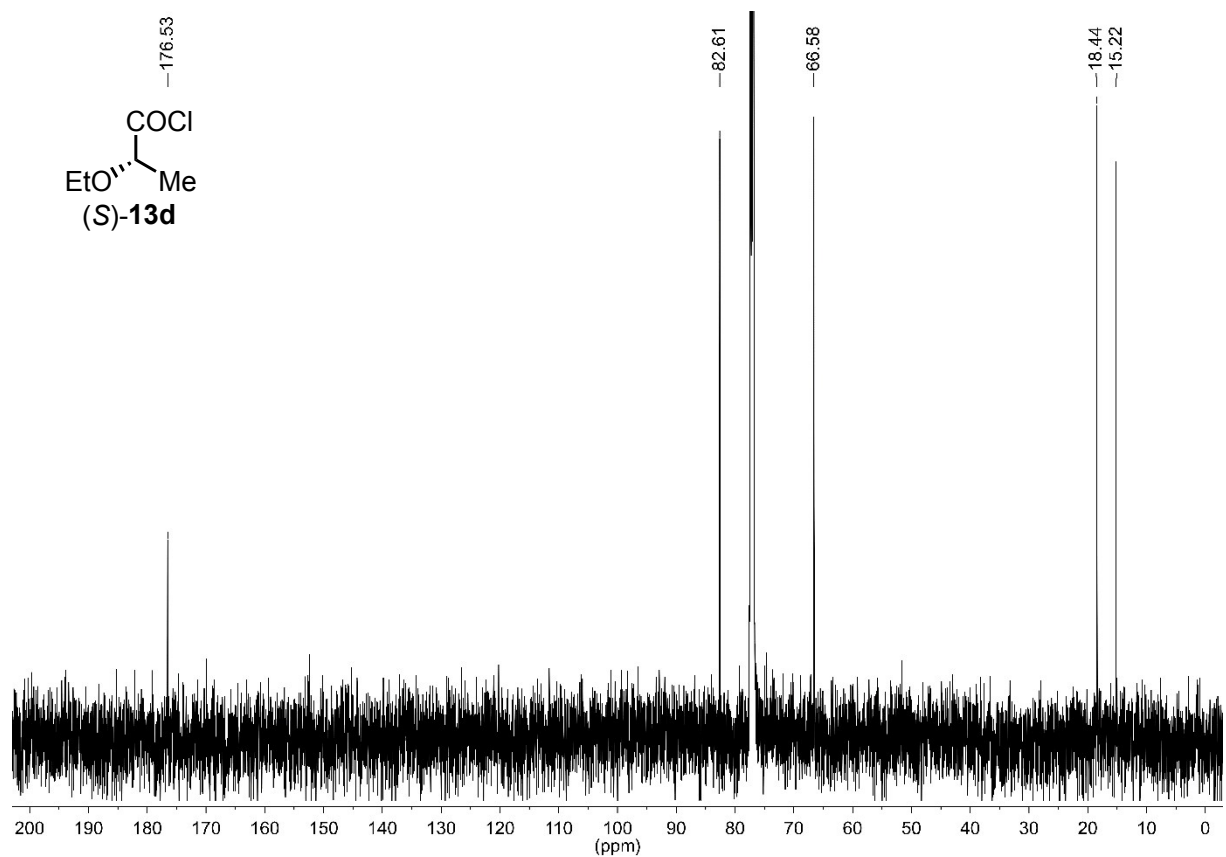

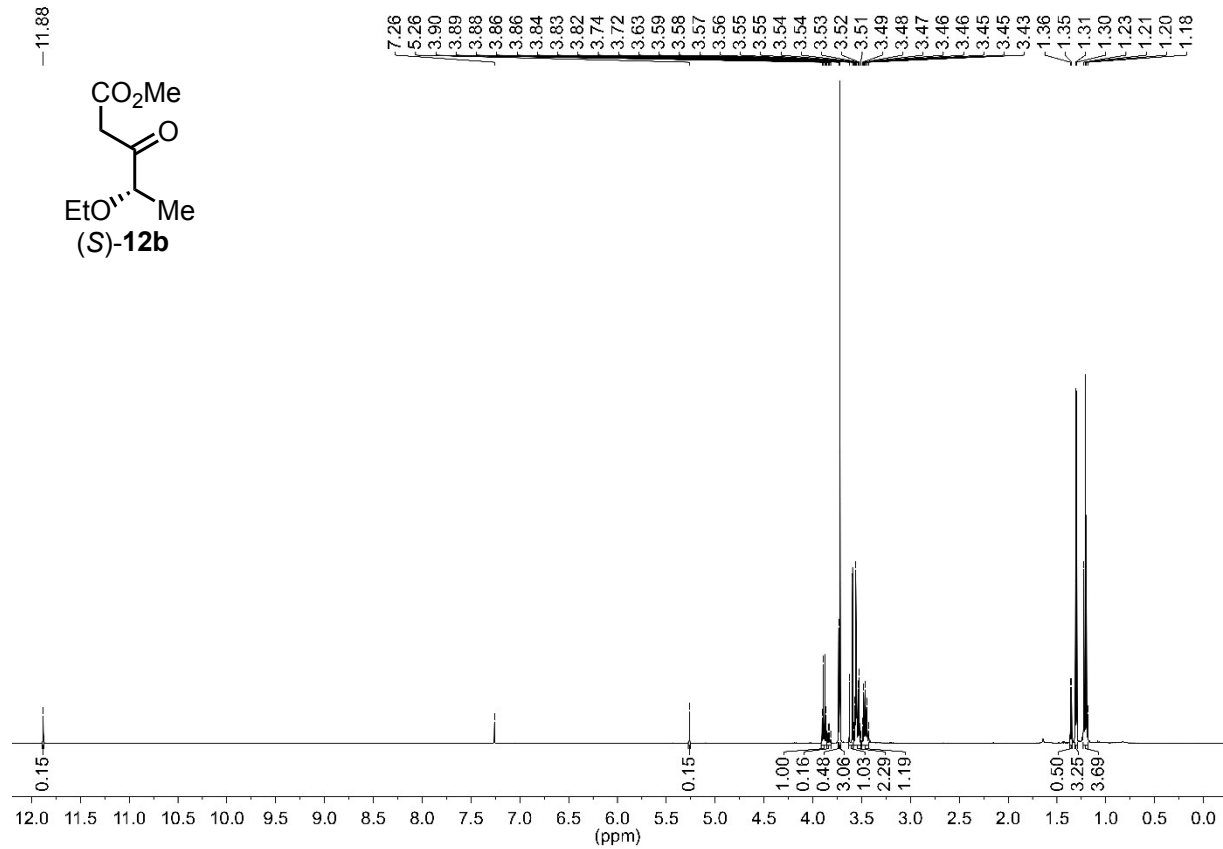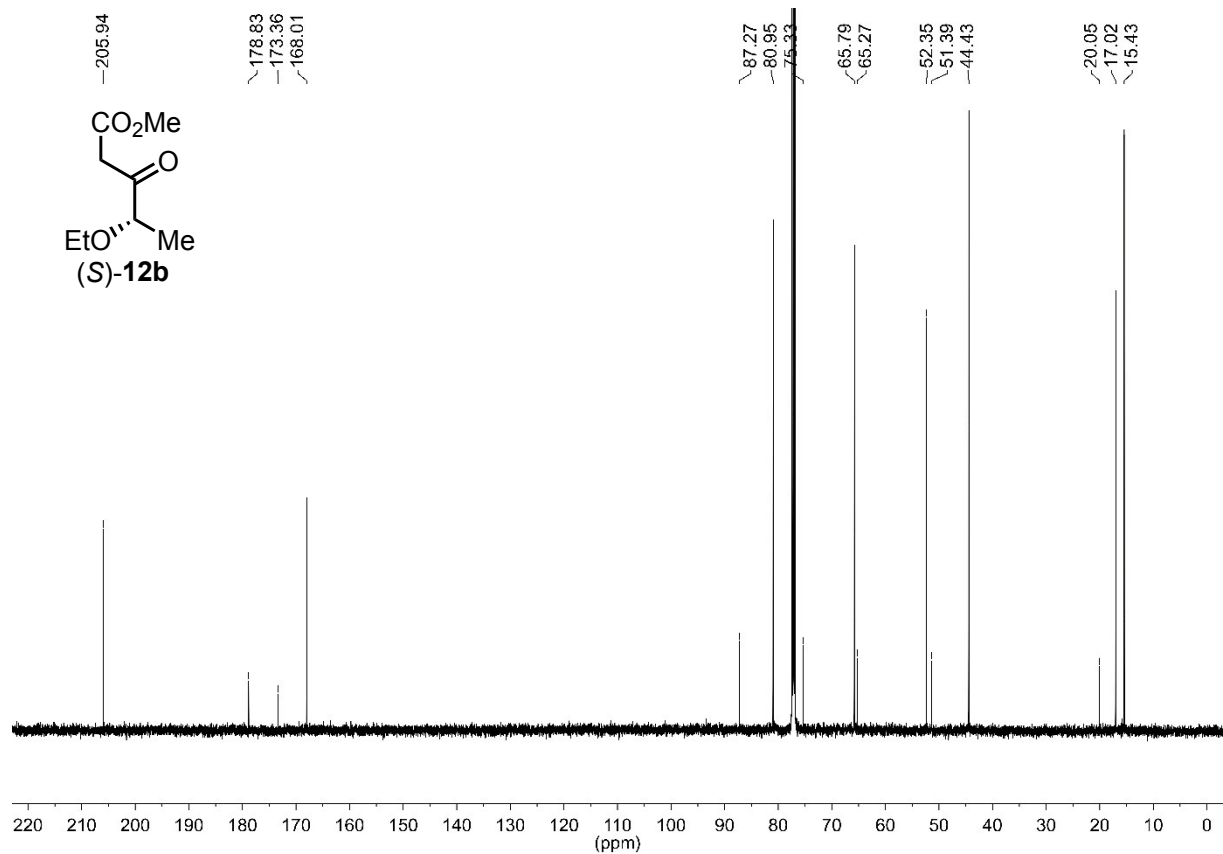

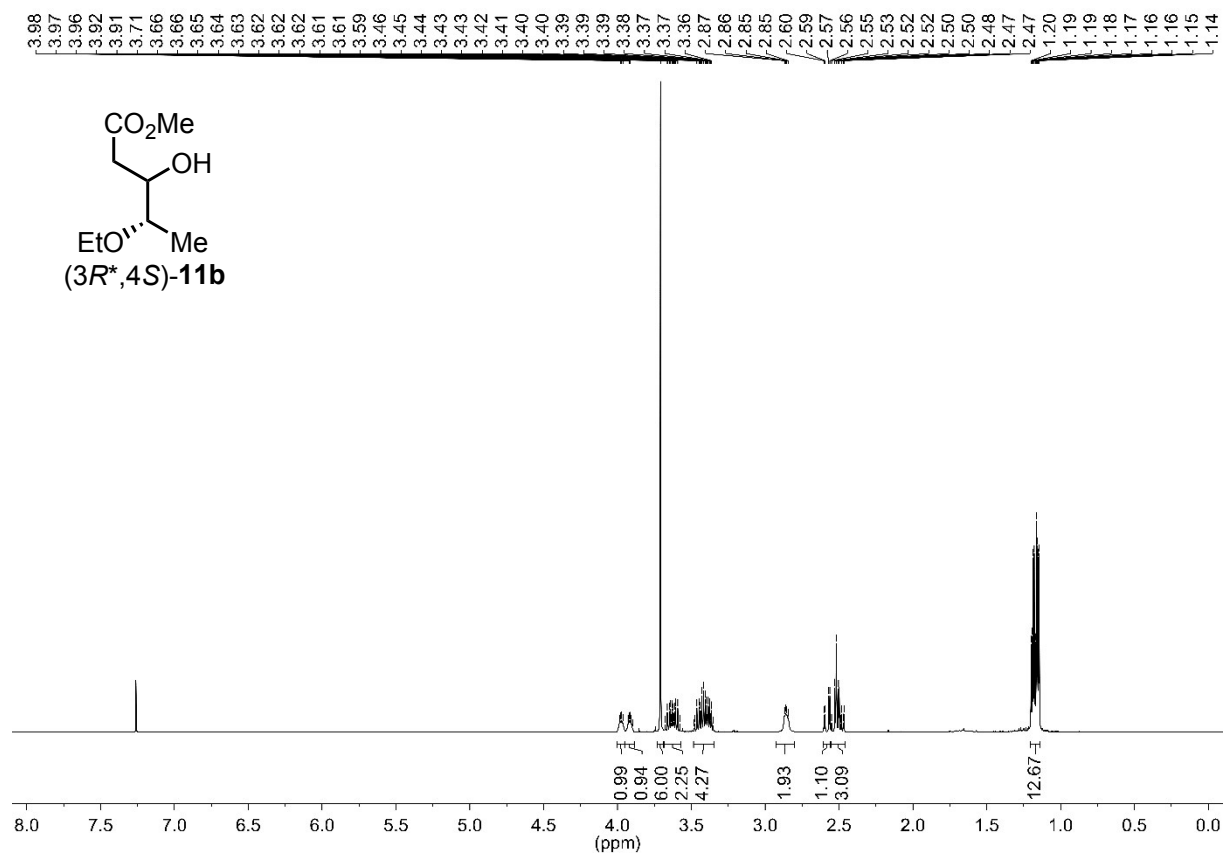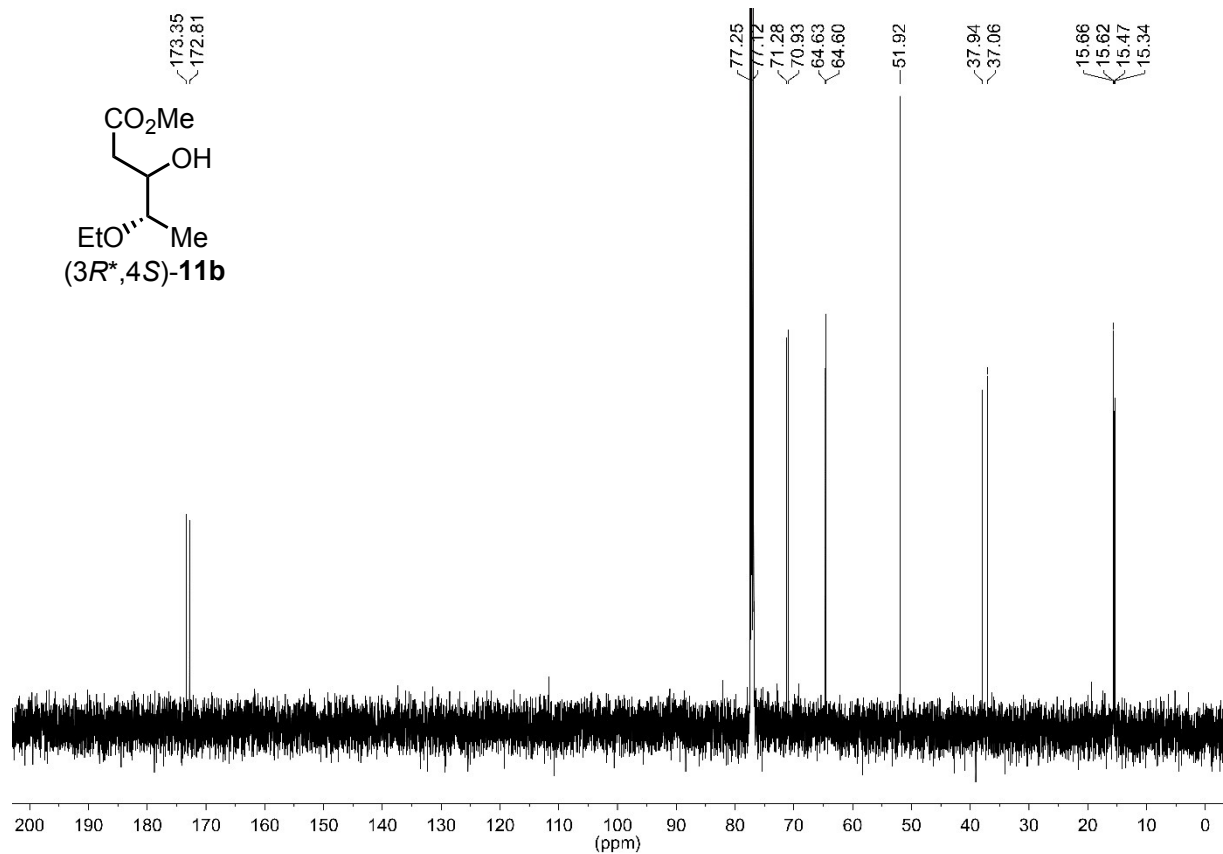



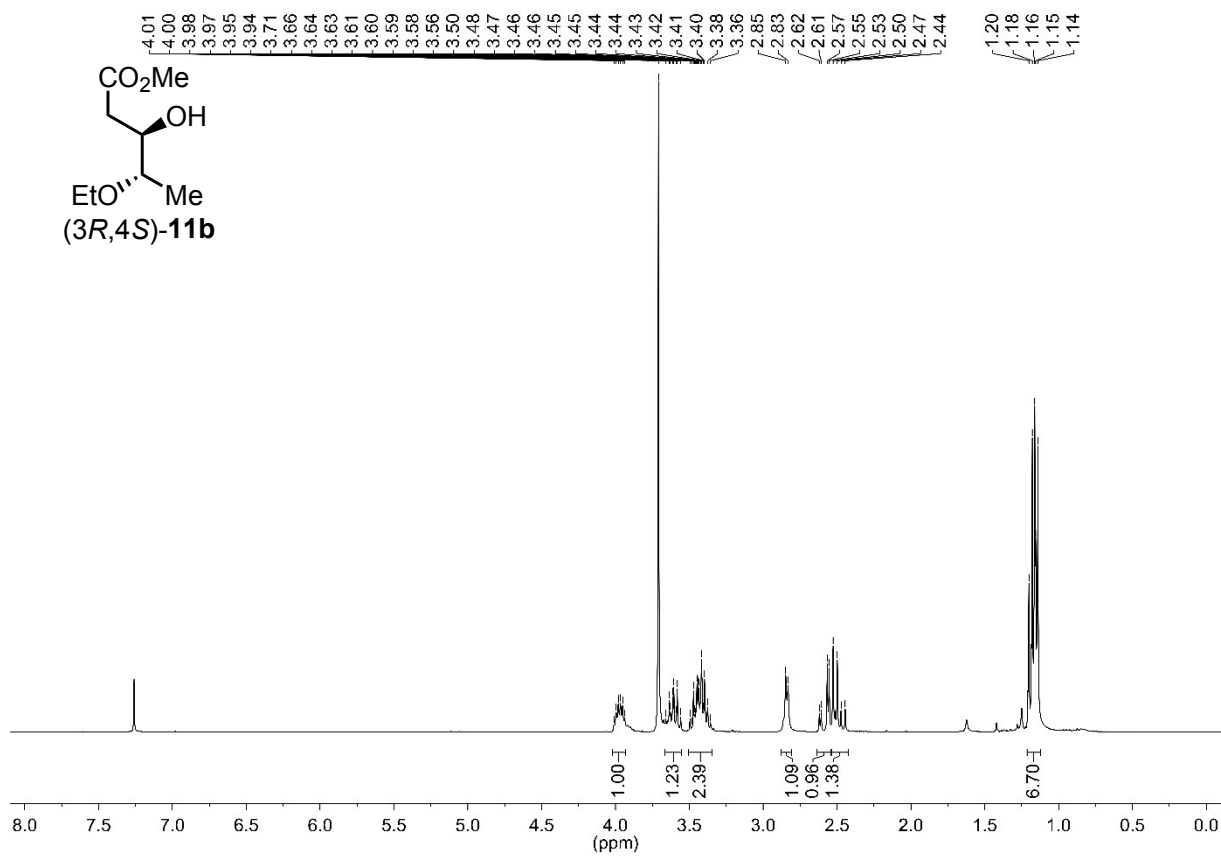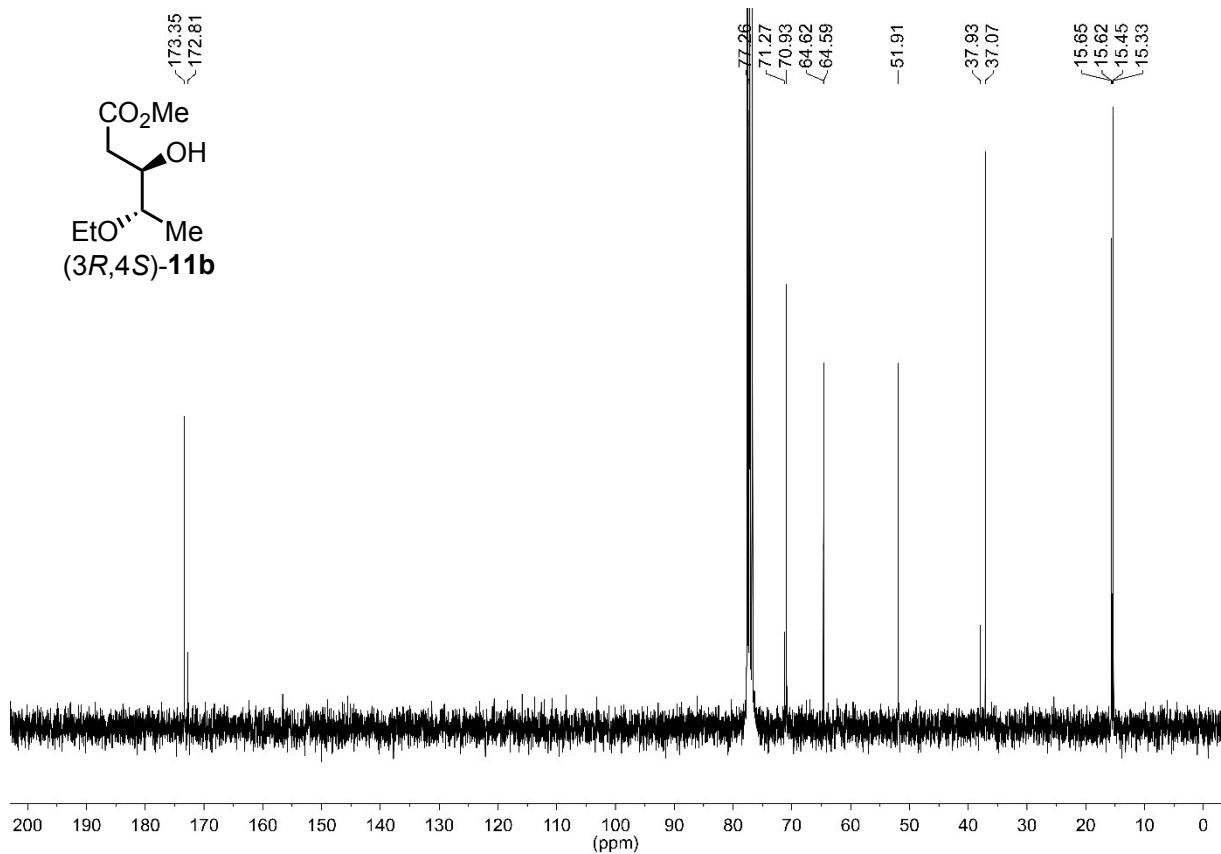

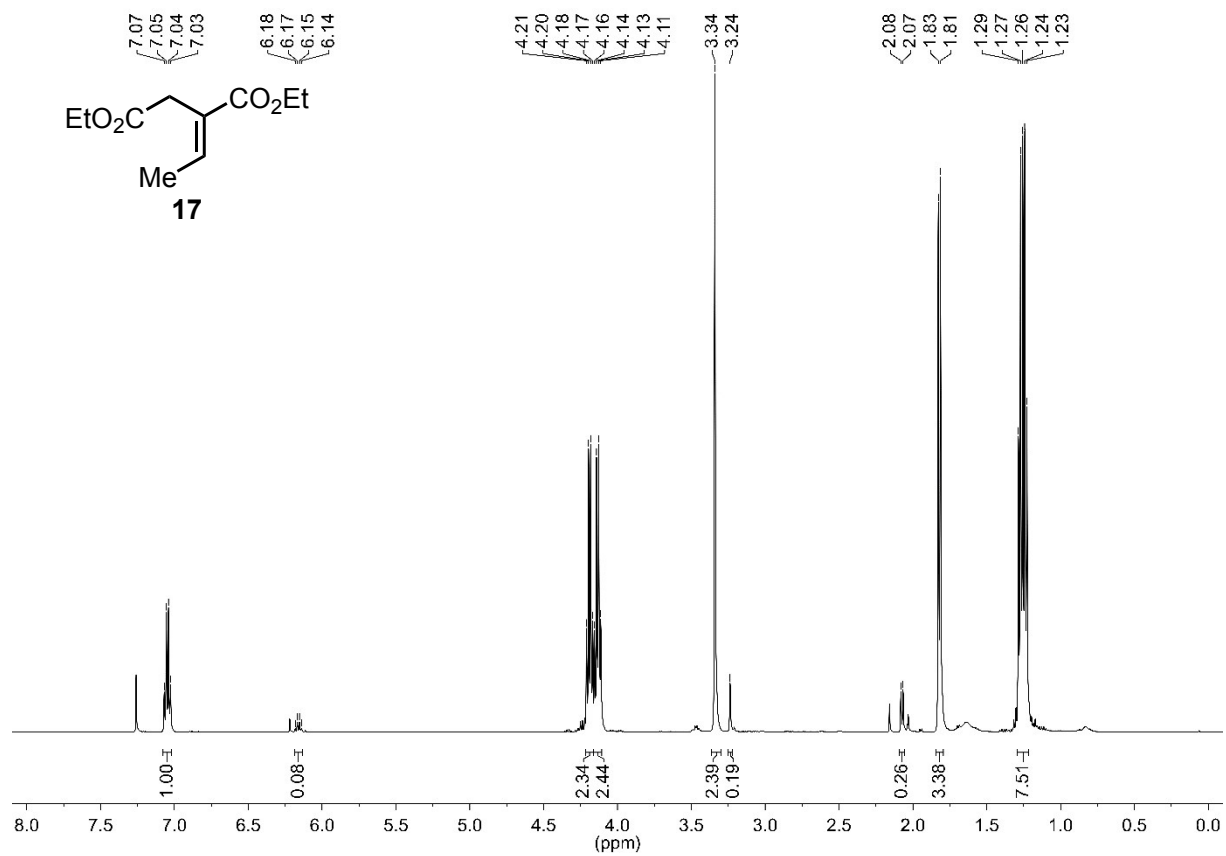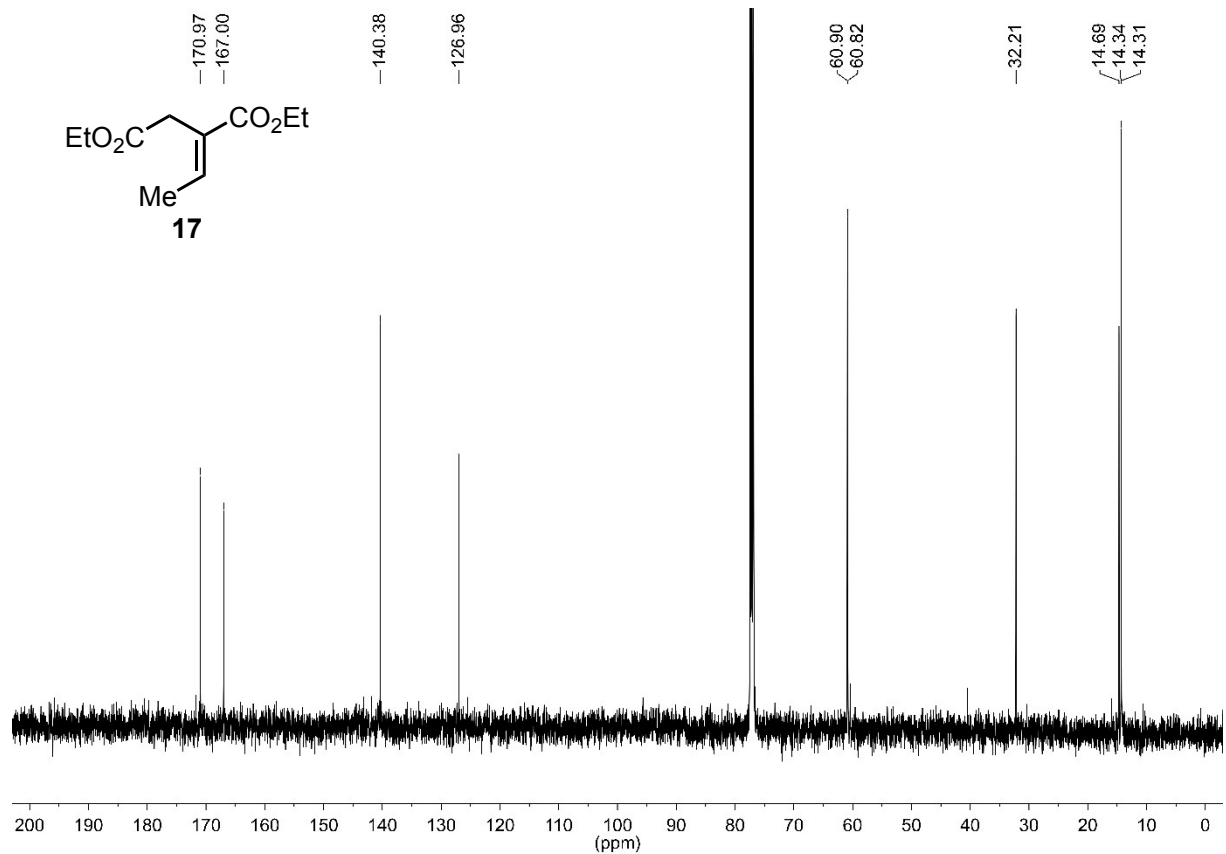

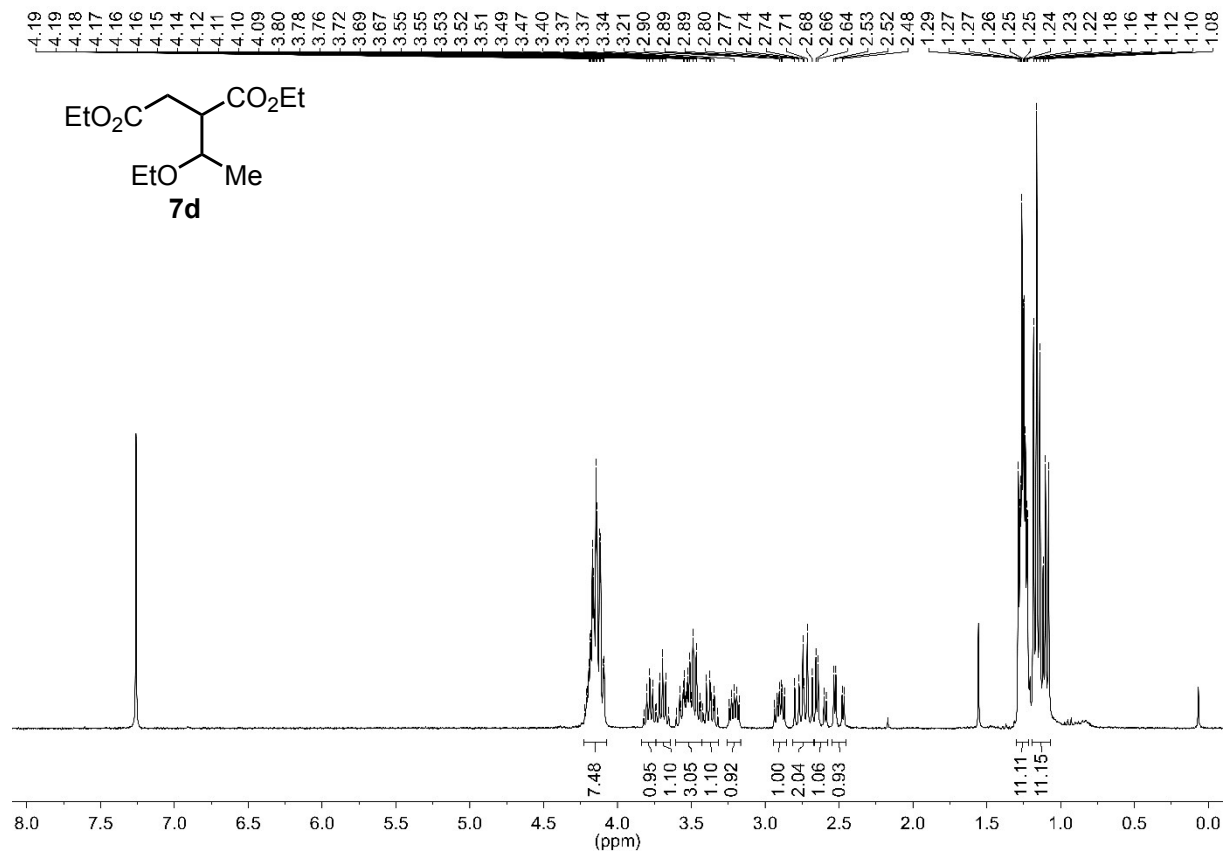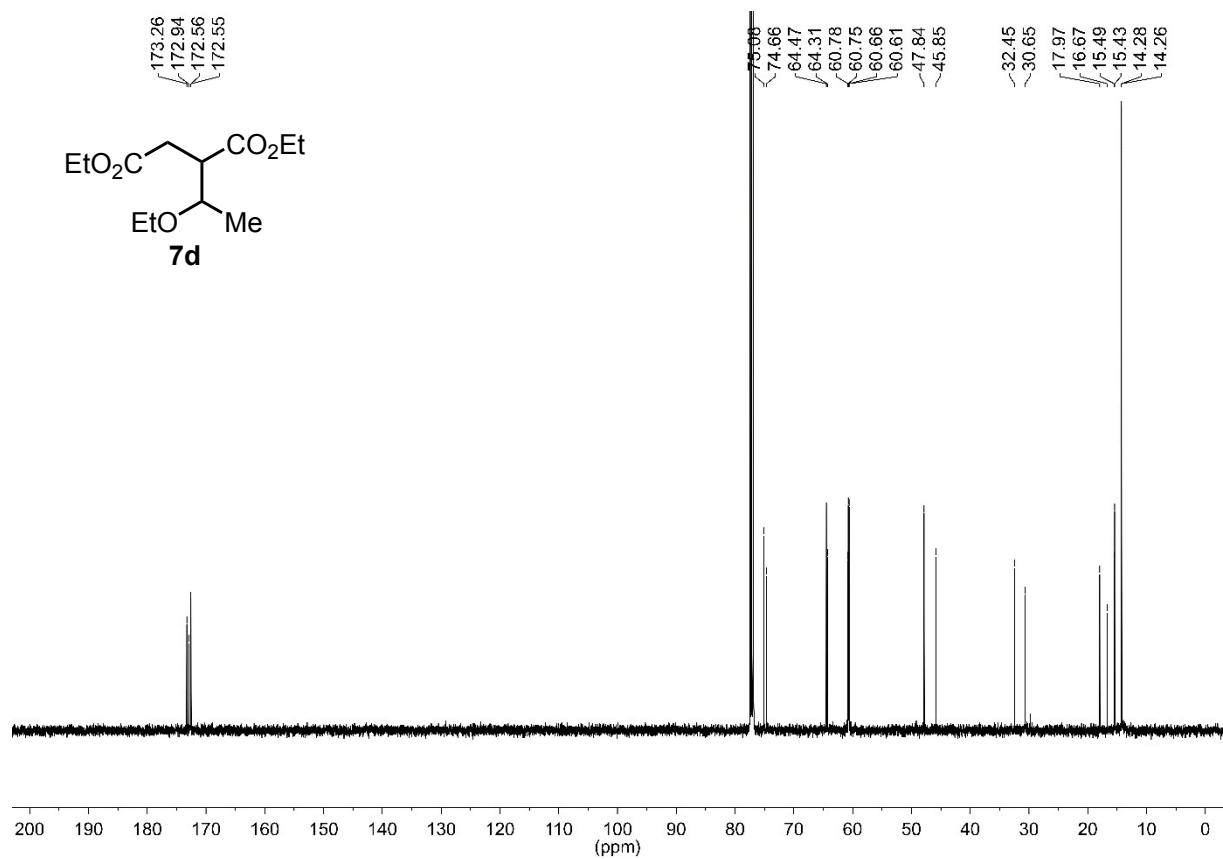

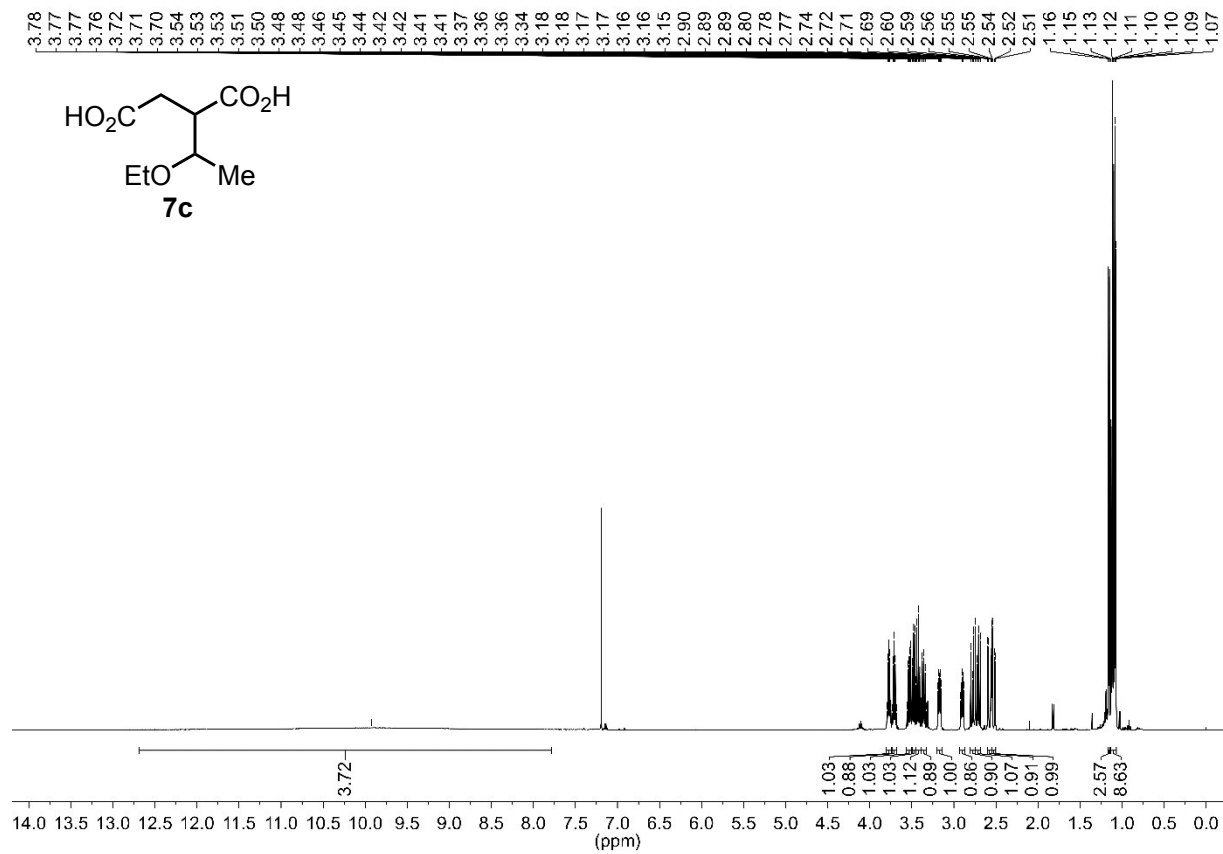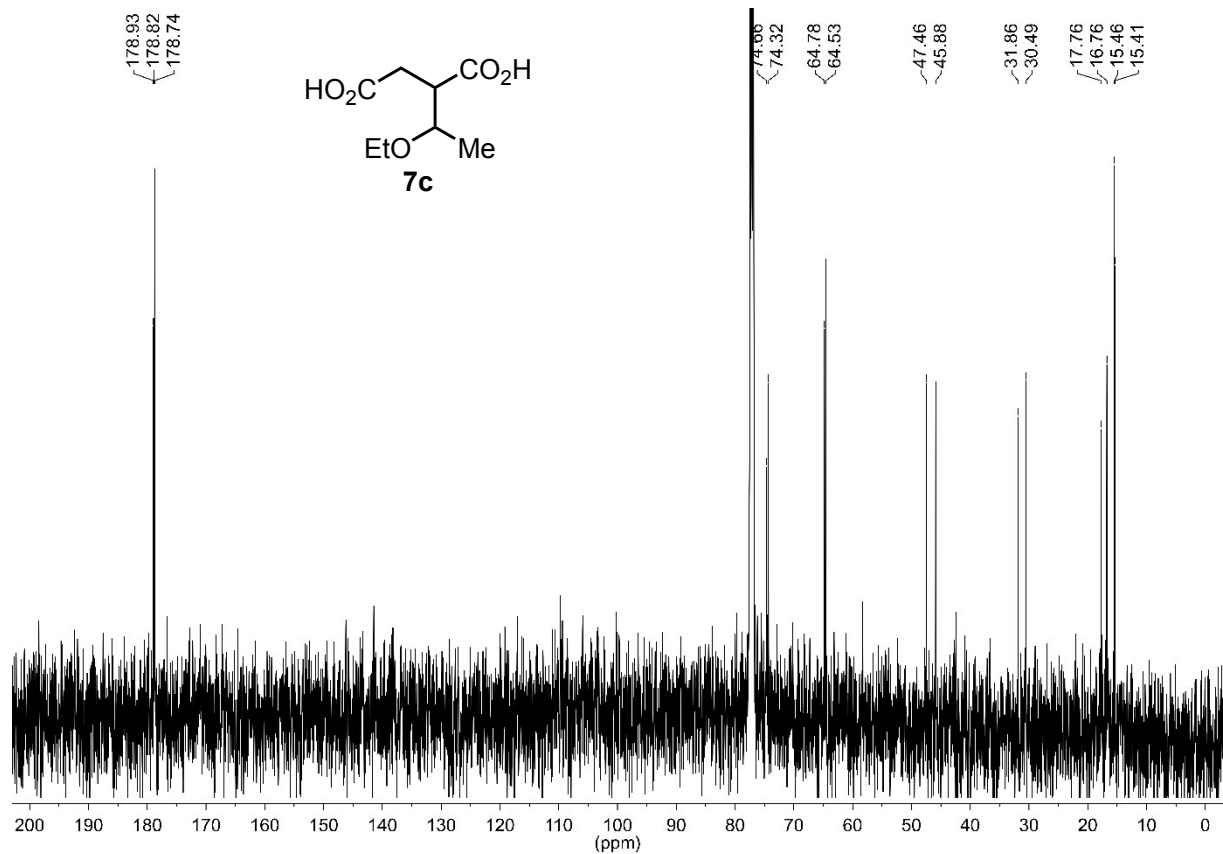

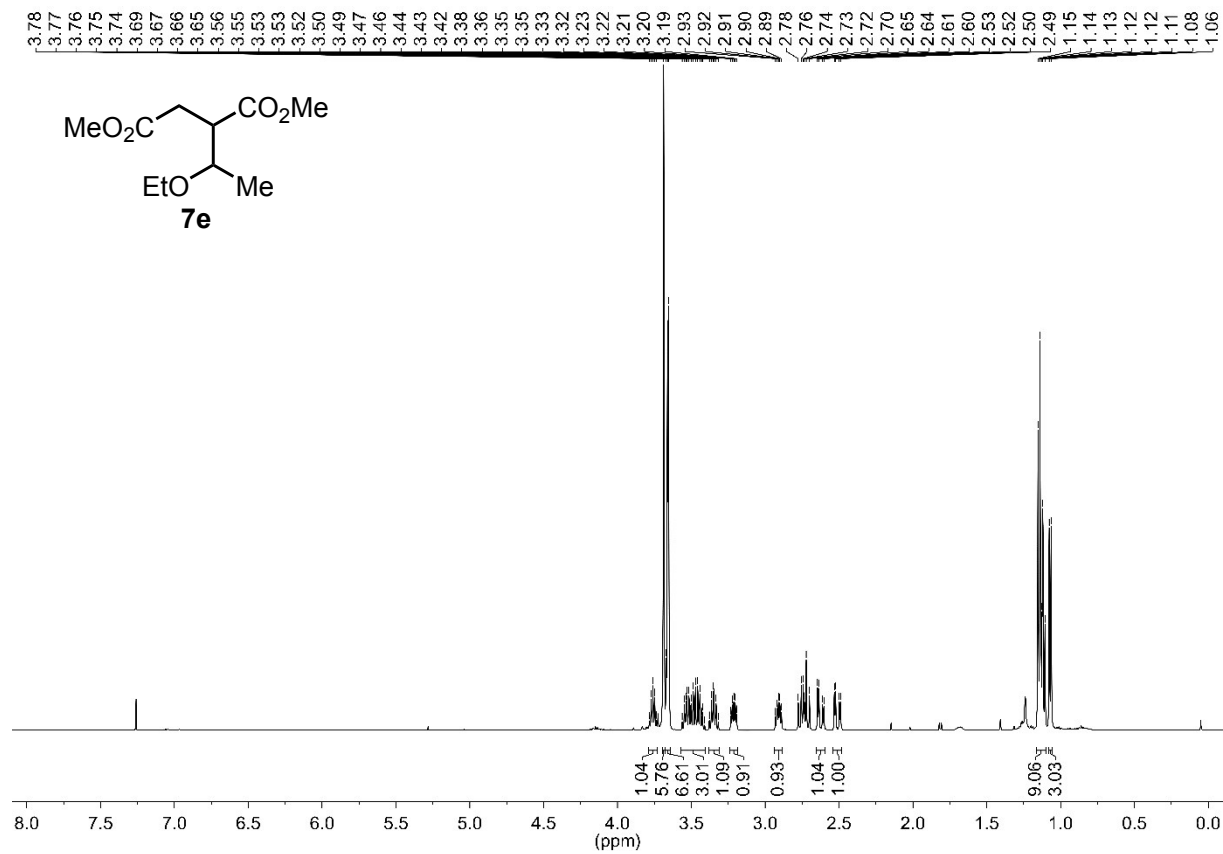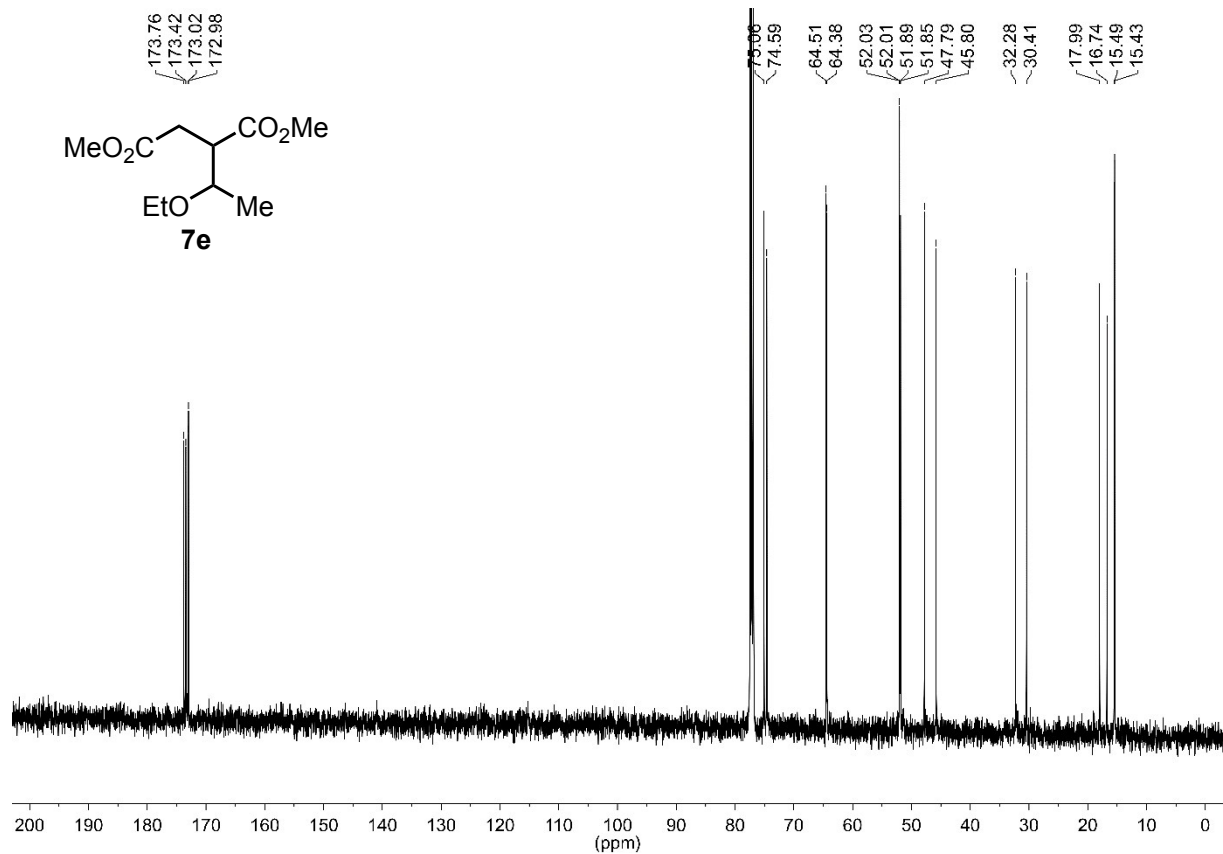

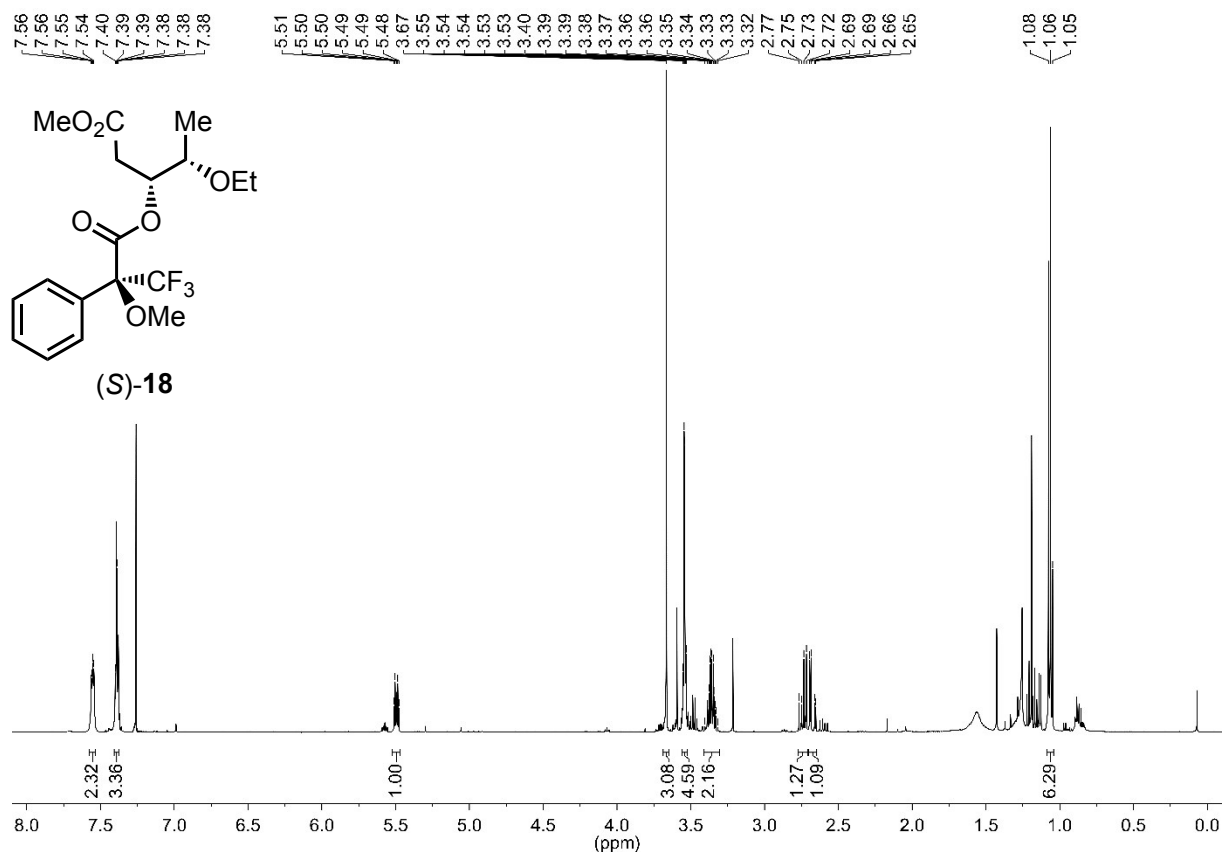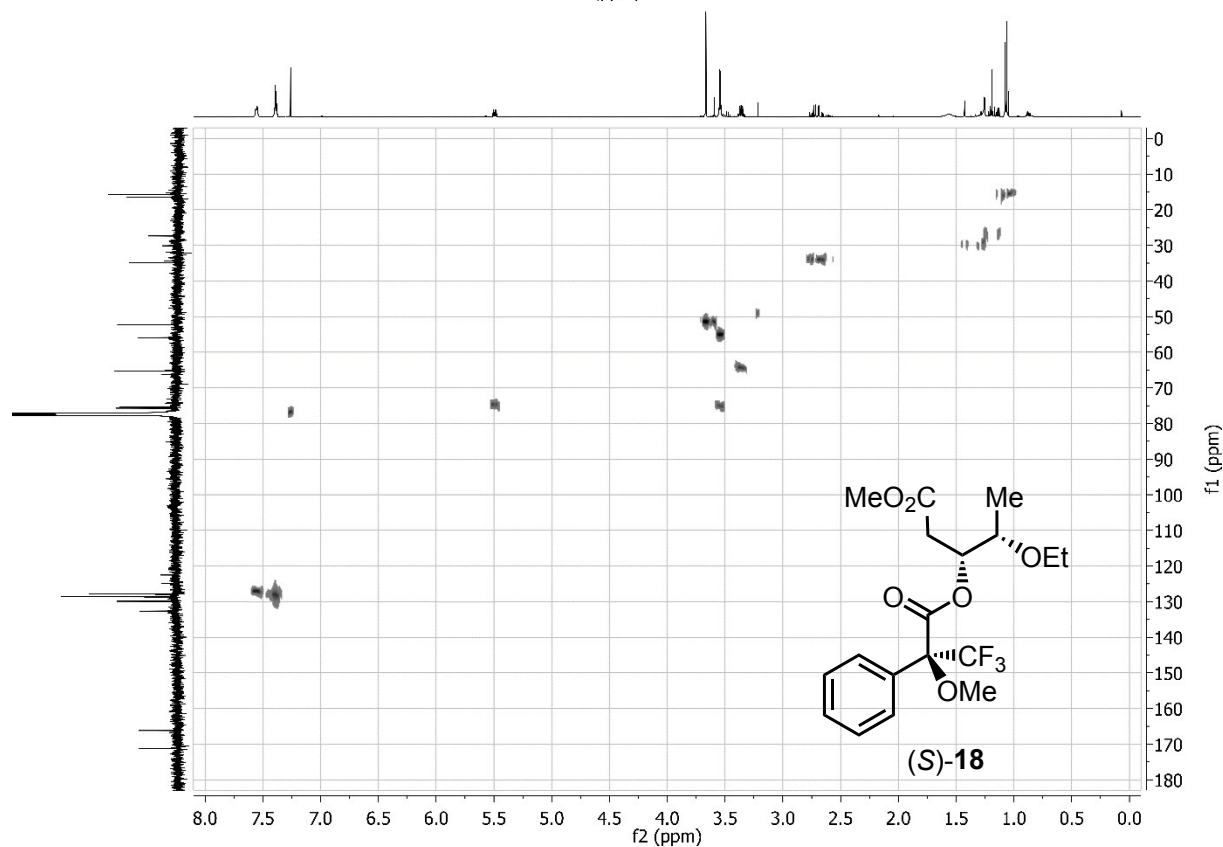

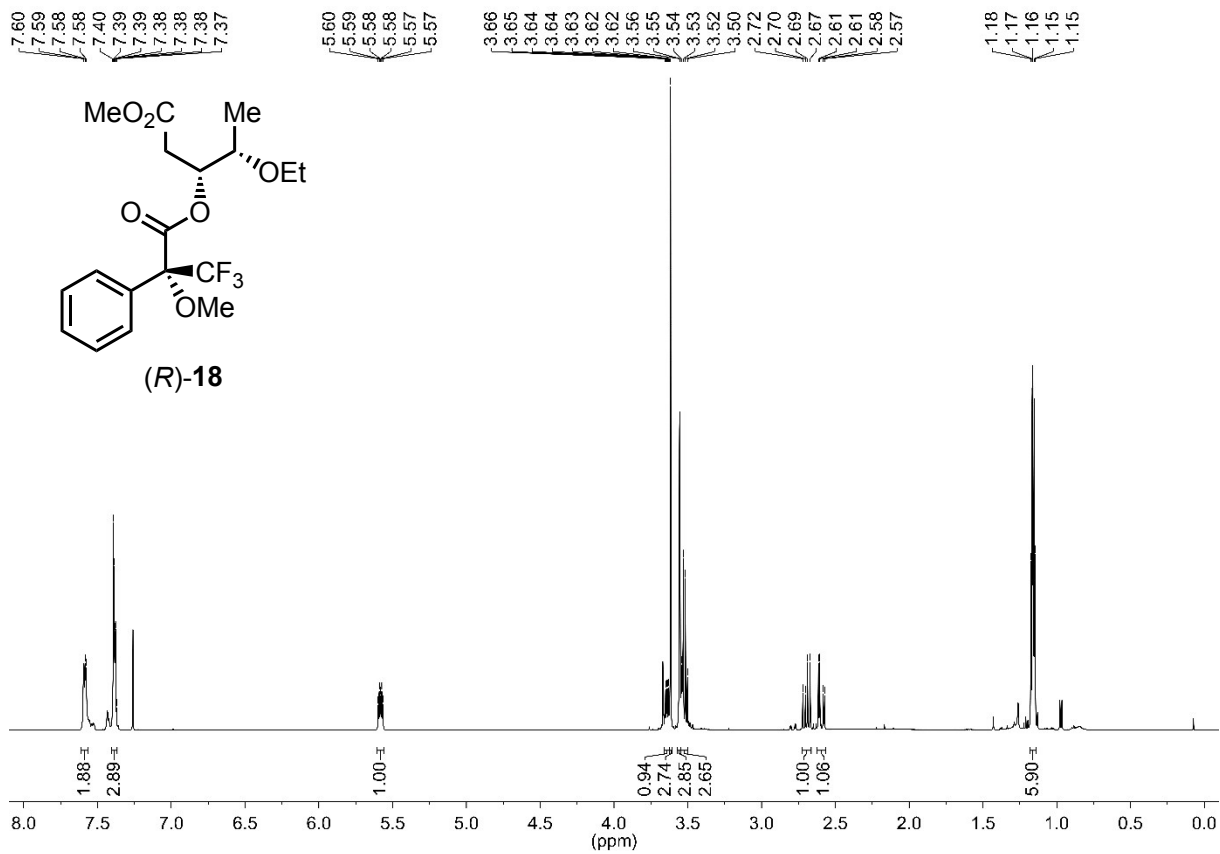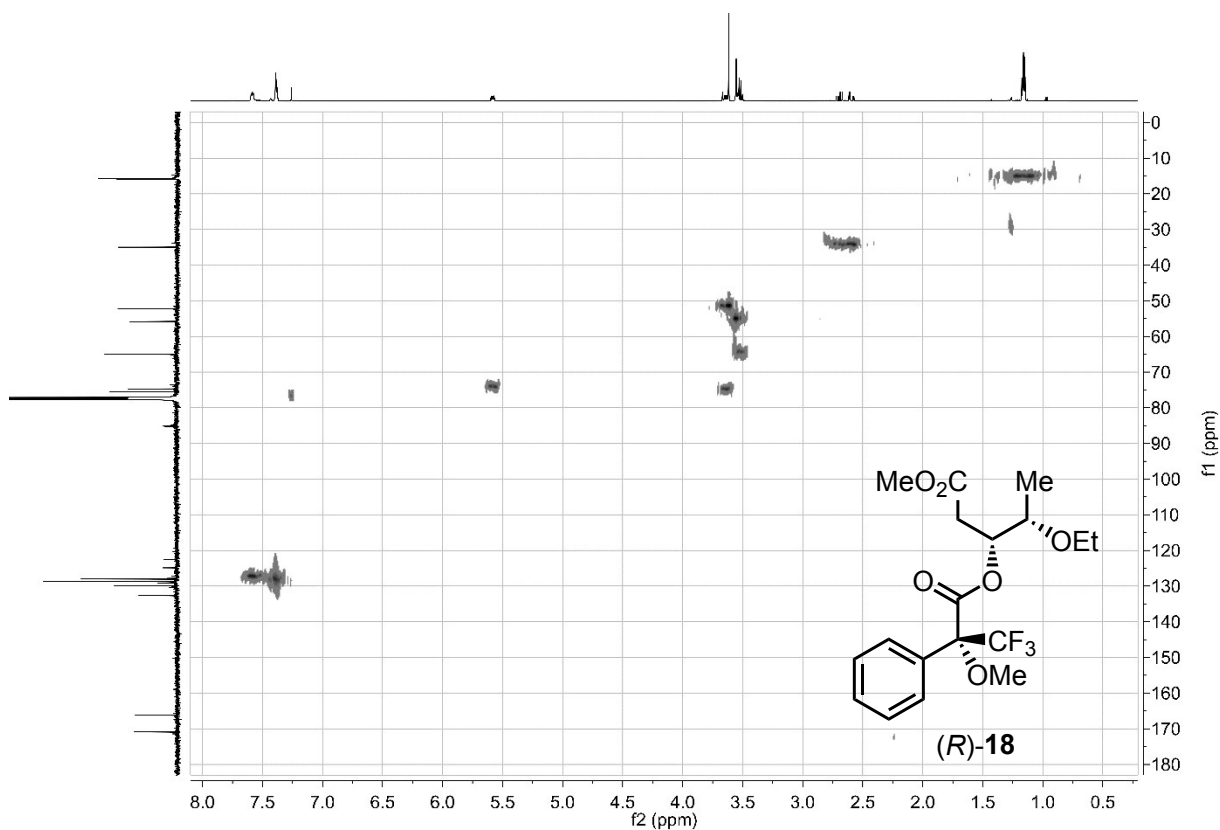

**Table S1.**  $\Delta\delta_{SR}$  ( $= \delta_S - \delta_R$ ) data for the (*S*)- and (*R*)-MTPA Mosher esters (*S*)-**18** and (*R*)-**18**

|                                                 | $\delta_S$ (( <i>S</i> )- <b>18</b> )<br>(ppm) | $\delta_R$ (( <i>R</i> )- <b>18</b> )<br>(ppm) | $\Delta\delta_{SR}$ ( $= \delta_S - \delta_R$ ) |              |
|-------------------------------------------------|------------------------------------------------|------------------------------------------------|-------------------------------------------------|--------------|
|                                                 |                                                |                                                | ppm                                             | Hz (500 MHz) |
| CH <sub>2</sub> CO <sub>2</sub> CH <sub>3</sub> | 3.67                                           | 3.62                                           | +0.05                                           | +25          |
| CH <sub>2</sub> CO <sub>2</sub> CH <sub>3</sub> | 2.67                                           | 2.59                                           | +0.08                                           | +40          |
| CH <sub>2</sub> CO <sub>2</sub> CH <sub>3</sub> | 2.74                                           | 2.70                                           | +0.04                                           | +20          |
| 4-H                                             | 3.54                                           | 3.64                                           | -0.10                                           | -50          |
| C-5 (CH <sub>3</sub> )                          | 1.07                                           | 1.16                                           | -0.09                                           | -45          |
| OCH <sub>2</sub> CH <sub>3</sub>                | 3.36                                           | 3.52                                           | -0.16                                           | -80          |
| OCH <sub>2</sub> CH <sub>3</sub>                | 1.06                                           | 1.16                                           | -0.10                                           | -50          |

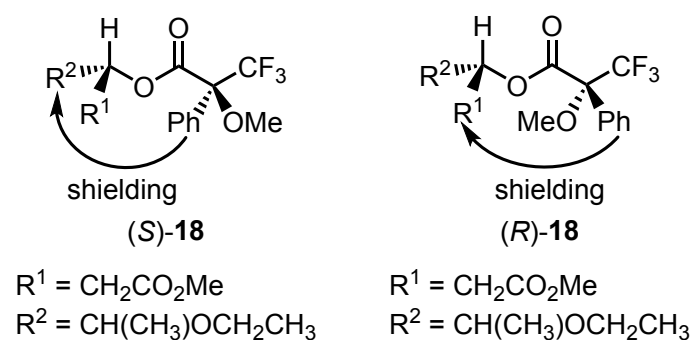

**Figure S12.** Mosher esters analysis of diastereomeric enriched (*3R,4S*)-**11b** by enantioselective reduction with baker's yeast. In case of mosher ester (*S*)-**18**, protons of the substructure of  $R^2$  are relatively more shielded by the phenyl-group and therefore shifted upfield (towards lower ppm values) in the NMR spectrum. Reversely, in case of mosher ester (*R*)-**18**, the protons of the substructure of  $R^1$  are relatively more shielded by the phenyl-group and therefore shifted upfield in the NMR spectrum.
